## **Human DNA polymerase delta is a pentameric complex with dimeric p12 subunit: Implications in enzyme architecture and PCNA interaction**

**Prashant Khandagale, Doureradjou Peroumal, Kodavati Manohar, and Narottam Acharya\***

Laboratory of Genomic Instability and Diseases, Department of Infectious Disease Biology, Institute of Life Sciences, Bhubaneswar-751023, India.

\*Correspondence to:

Narottam Acharya, Phone: 91-674-230 3540, Fax: 91-674-230 0728,

E-mail: narottam\_acharya@ils.res.in; narottam74@gmail.com

Running title: p12 the smallest subunit of hPol $\delta$

Key words: Processivity, formaldehyde cross-linking, size exclusion chromatography, Cdm1, Replication foci, DNA replication

## Abstract

Human DNA polymerase delta (Pol $\delta$ ), a holoenzyme consisting of p125, p50, p68 and p12 subunits, plays an essential role in all the three DNA transaction processes. Herein, using multiple physicochemical and cellular approaches we found that the p12 protein forms a dimer in the solution. *In vitro* reconstitution and pull-down of cellular Pol $\delta$  by tagged p12 authenticates pentameric nature of this critical holoenzyme. Further, a consensus PIP motif at the extreme carboxyl terminal tail and a homodimerization domain at the amino-terminus of the p12 subunit were identified. Our mutational analyses of p12 subunit suggest that  $_3\text{RKR}_5$  motif is critical for dimerization that facilitates p12 binding to IDCL of PCNA via its PIP motif  $_{98}\text{QCSLWHLY}_{105}$ . Additionally, we observed that oligomerization of the smallest subunit of Pol $\delta$ s is evolutionarily conserved as Cdm1 of *S. pombe* also dimerizes. Thus, we suggest that human Pol $\delta$  is a pentameric complex with a dimeric p12 subunit; and discuss implications of p12 dimerization in regulating enzyme architecture and PCNA interaction during DNA replication.

## Introduction:

Accurate and processive DNA synthesis by DNA polymerases (Pol) during chromosomal DNA replication is essential for the preservation of genomic integrity and for the suppression of mutagenesis and carcinogenesis (1). Eukaryotic chromosomal DNA replication is coordinated by three essential replicases: Pol $\alpha$ , Pol $\delta$ , and Pol $\epsilon$  (2,3). Based on biochemical and genetic studies mostly those carried out in the budding yeast, it has been proposed that Pol $\alpha$  initiates DNA replication by synthesizing a short RNA-DNA primer, and is followed by loading of DNA clamp PCNA by its loader RFC. Pol $\delta$  not only can synthesize “Okazaki fragments” in lagging strand, it can also take part in leading strand DNA synthesis (4,5). The precise role of Pol $\epsilon$  remains controversial but studies indicate that it plays a role in initiation and leading strand synthesis of DNA replication (3). The mechanism of DNA replication in higher eukaryotes is yet to be deciphered; however, the *in vitro* SV40 replication system suggests requirement of human Pol $\alpha$  and Pol $\delta$  to complete DNA synthesis (2,6). Irrespective of their different roles in DNA replication, these DNA polymerases possess certain commonalities like multisubunit composition, and the largest subunits only possessing signature sequences of a B-family DNA polymerase having catalytic activity (7). The accessory structural subunits of DNA polymerases do not show any sequence similarities between them, therefore understanding their functions is quite intriguing.

Among the replicative DNA polymerases, the subunit composition of Pol $\delta$  varies from organism to organism. While ScPol $\delta$  consists of three subunits Pol3, Pol31 and Pol32, Pol $\delta$  from *S. pombe* possesses four subunits Pol3, Cdc1, Cdc27 and Cdm1 (5,8-10). The mammalian Pol $\delta$  holoenzyme consists of p125 as the catalytic subunit, the yeast homologue of Pol3; p50, p68 and p12 structural subunits (11). The accessory subunits p50 and p68 are the equivalents of Pol31/Cdc1 and Pol32/Cdc27 subunits, respectively. The p50/Pol31/Cdc1 subunit makes a connecting bridge between the catalytic subunit p125/Pol3 and p68/Pol32/Cdc27, and is indispensable for cell viability. Even though Pol32 is not essential for cell survival in *S. cerevisiae*, in its absence cells exhibit sensitivity to both high and cold temperatures, and susceptibility to genotoxic stress (12). Contrarily, deletion of Cdc27 in *S. pombe* is not achievable (13). The non-essential p12 subunit is the Cdm1 homologue and is apparently absent in *S. cerevisiae*. Yeast two hybrid and co-immunoprecipitation analyses suggested a dual interaction of p12 with p125 and p50; however, the modes of binding are yet to be defined (14). *In vitro* reconstitution has facilitated purification of four different subassemblies of human Pol $\delta$  such as p125 alone, p125-p50 (core complex), p125-p50-p68 and p125-p50-p68-p12 complexes for biochemical studies. Reports also suggest that the subunit composition of human Pol $\delta$  may alter *in vivo* with cellular response to genotoxic burden (15,16). Upon treatment of human cells with genotoxins such as UV, methyl methanesulfonate, HU and aphidicolin, the p12 subunit undergoes

rapid degradation to result in a trimeric human Pol $\delta$  (p125/p50/p68) equivalent to yeast form with higher proof reading activity (17). Thus, p12 subunit seems to play a crucial role in regulating Pol $\delta$  function.

The function of Pol $\delta$  as a processive DNA polymerase mostly depends upon its association with PCNA that acts as a sliding clamp (18). The interaction of PCNA-binding proteins with PCNA is mediated by a conserved PCNA-interacting protein motif (PIP-box) with a consensus sequence Q-x-x-(M/L/I)-x-x-FF-(YY/LY). Previously, we have shown that all the three subunits of ScPol $\delta$  functionally interact with trimeric PCNA mediated by their PIP motifs (5). To achieve higher processivity *in vitro*, all the three PIP boxes are required; however for cellular function of ScPol $\delta$ , along with PIP of ScPol32, one more PIP box either from Pol3 or Pol31 subunit are essential. Similarly, reports from human Pol $\delta$  studies suggest that all the four subunits of hPol $\delta$  are involved in a multivalent interaction with PCNA and each of them regulates processive DNA synthesis by Pol $\delta$  (19). Except in p68 and p50, PIP motifs in p125 and p12 have not been mapped (20,21). Studies based on far-Western and immunoprecipitation analyses revealed that the first 19 amino acids of p12 are involved in PCNA interaction, although the region lacks a canonical PIP box sequences (14,22).

Therefore, in this study we have re-investigated the interaction of p12 with other Pol $\delta$  subunits and PCNA. Our results indicate that the smallest subunit p12 exists as a dimer in solution to establish a dual interaction with both p125 and p50 subunits of Pol $\delta$ . The dimerization motif has been mapped to the amino-terminal end and a novel conserved PIP box has been identified in the c-terminal tail of p12. Importantly, dimerization of p12 regulates its interaction with PCNA. Based on our observations we propose that human Pol $\delta$  exists in a pentameric form in the cell in addition to other subassemblies; and the effect of p12 dimerization on PCNA binding with various subassemblies have been discussed.

## Results:

### Oligomerization of p12 subunit of hPol $\delta$

In several studies, human Pol $\delta$  holoenzyme has been purified either from insect cell line or bacterial systems by using standard chromatography techniques for biochemical characterizations (11,23,24). Although most of the purified Pol $\delta$  used in various enzymatic assays was containing all the four subunits p125, p50, p68 and p12; in most cases the proposed stoichiometry of each subunit in the holoenzyme 1:1:1:1 was less convincing. Especially the smallest subunit p12 was more than 1:1 ratio with respect to others. The band intensity of p12 was always either similar or more than that of other subunits (23,24). Even when we attempted to purify hPol $\delta$  holoenzyme by using GST-affinity beads, the band intensity of p12 protein was consistently higher than the other subunits (Supplementary Fig. 1). Such discrepancy in Pol $\delta$  composition could arise due to either oligomeric status of p12 or multi-subunit p12 interaction with p125 and p50 or due

to staining artifacts. To examine potential oligomerization status of p12 subunit, yeast two hybrid assay and native PAGE analysis were carried out (Fig. 1). p12 orf was fused in frame with both *GAL4* activation (AD), and *GAL4* binding domains (BD). Other hPol $\delta$  subunit orfs were fused with the *GAL4* binding domain only. The HFY7C yeast reporter strain harboring the AD-p12 plasmid was co-transformed with any of the BD-Pol $\delta$  subunit plasmids, and selected on Leu<sup>-</sup>Trp<sup>-</sup> SDA plate. The interactions of p12 with any subunits of Pol $\delta$  in these transformants were analyzed by selecting them on plate lacking histidine. Growth on His<sup>-</sup> plate demonstrates interaction between the two fusion proteins as only the binding of two proteins make it possible to form an intact *GAL4* activator to confer *HIS* expression. As reported earlier, p12 interaction was observed with p125 and p50 but not with p68 (Fig. 1 A, sectors 1, 2, and 3) (14). Surprisingly, p12 subunit also interacted with itself to give *HIS* expression (sector 4); while no growth was observed in the negative controls (sector 5 and 6). As no growth was observed to show p12 and p68 binding, our results suggest that p12 makes specific multivalent interaction with itself, p125 and p50 subunits; and such interactions are not mediated through any yeast proteins.

Further to ascertain oligomerization of p12, protein was purified to near homogeneity from bacterial cells by using GST-affinity column chromatography, GST-tag was cleaved off by PreScission protease, and analyzed by both native and SDS containing polyacrylamide gel electrophoresis (PAGE). The predicted MW of p12 is ~12 kDa with a pI of 6.3. p12 is known to possess abnormal migration in SDS-PAGE (25) and similarly we observed the protein to migrate at ~15 kDa molecular weight size position (Fig. 1 B lane 2). By taking advantage of native PAGE analysis where proteins resolve based on their charge and hydrodynamic size, we found that p12 migrated at similar position with Carbonic anhydrase (CA) which is a protein of 30 kDa with pI 6.4 ( lane 4 and 5). Thus, the co-migration of two proteins indicate that both CA and p12 possess similar mass to charge ratio and the slower migrating p12 is potentially a dimeric complex.

By taking advantage of Isothermal calorimetry (ITC) technique, the oligomerization of p12 protein was examined (Fig. 1C i). p12 was placed both in the sample cell and in the syringe of the calorimeter and binding was analyzed by monitoring the change in entropy. The  $\Delta H$  was ~ -1.82 kcal/mol, the  $\Delta G$  was - 9.48 kcal/mol, and the *K<sub>d</sub>* for the complex was ~146 nM. The number of ligand binding site as derived from the ITC analysis was found to be ~0.6, which is closed to 1:1 binding of p12 monomers. Thus, our both *in vivo* and physiochemical study clearly indicate homodimerization of p12 subunit.

### **Cellular existence of oligomeric p12 in Pol $\delta$ complex and co-localization with PCNA**

In order to decipher p12 oligomerization in its cellular state, Pol $\delta$  holoenzyme was immunoprecipitated from the cell lysate transfected with GFP-p12 by using either anti-GFP (i) or anti-p125 (ii) antibody (Fig. 2 A). Irrespective of any antibody used for the pull-down assay, we detected presence of five subunits of

Pol $\delta$  in the beads. Each of the four native subunits (p125, p68, p50 and p12) were detected by probing with subunit specific antibody where as GFP-p12 was detected by anti-GFP antibody. While GFP-p12 pulled down cellular heterotetrameric Pol $\delta$  complex, anti-p125 antibody precipitated Pol $\delta$  complex with both the forms of p12 (native and GFP-tagged). Thus, even in the cellular context, p12 exists as an oligomer in the Pol $\delta$  complex.

PCNA that functions as a cofactor for DNA polymerases orchestrates the replisome by recruiting multiple proteins involved in DNA transaction processes. Using microscopy, it was shown that PCNA forms distinct foci or replication factories indicative of active DNA replication entities within the nucleus (26). The p68 and p50 subunits of hPol $\delta$  were deciphered to form foci and co-localized with PCNA in several cell lines (27,28). To examine physiological relevance of p12 oligomerization and PCNA interaction, GFP- PCNA or GFP-p12 with RFP-p12 fusion constructs were transfected to CHO cell line. As shown in Fig.2 B, irrespective of GFP (stained green) or RFP (stained red) fusion, p12 formed discrete compact foci and the patterns were very similar to reported p50 and p68 foci. Subsequent merging of foci in co-transfectant of GFP-p12 and RFP-p12 resulted in appearance of yellow foci (i). Thus, 100% coincidental accumulation of both the p12 foci suggests that both the proteins are part of replication unit and function together. Similarly, we have also observed sub-cellular co-localization of p12 with PCNA as yellow foci appeared by merging foci of GFP-PCNA and RFP-p12 (ii). However, in similar condition, we did not notice any co-localization of GFP-p12 and RFP-Pol $\theta$  foci (iii). We suggest from these observations that p12 could function in replication factories as an oligomeric protein with PCNA.

### Identification of motifs involved in p12 dimerization and interaction with PCNA

To identify dimerization and PIP motifs in p12, primary sequences from human, mouse, bovine and *S. pombe* were aligned (Fig. 3 A). The CLUSTAL W alignment analysis showed a high degree of amino acid conservation of p12 sequences in mammals, and they showed only ~17% identity with *S. pombe* orthologue Cdm1. The carboxyl termini of these proteins displayed better conservation than the amino termini. Cdm1 is composed of 160 aa and the divergence is apparently due to possession of an insert of about 38 amino acids exactly in the middle of the p12 homology sequences in Cdm1. We thought to examine the role of two highly conserved sequences located at the extreme ends of p12: a basic tripeptide sequence <sub>3</sub>RKR<sub>5</sub> (henceforth referred as RKR motif) motif and a putative PIP box sequence <sub>98</sub>QCSLWHL<sub>Y105</sub> (henceforth referred as PIP motif). The putative PIP motif is located in the carboxyl terminal tail of p12, which is the usual position of PIP in most of the DNA polymerases and appears to be very similar to known PIP sequences (Fig. 3 B). Since, an earlier study reported <sub>4</sub>KRLITDSY<sub>11</sub> (a part of RKR motif) as a PCNA binding region of p12 (14), we wanted to compare the model structure of this peptide with <sub>98</sub>QCSLWHL<sub>Y105</sub>. Structurally PIP box sequences are highly conserved and formation of a <sub>3</sub><sub>10</sub> helix is a

characteristic of such sequences. The amino acid stretch encompassing RKR (1-MGRKRLITDSYPVK-14) and PIP (92-GDPRFQCSLWHL YPL-106) domains were used for peptide structure prediction by using PEP-FOLD3 server (<http://bioserv.rpbs.univ-paris-diderot.fr/services/PEP-FOLD3/>) rather than using a known template based prediction to avoid any biasness. Further the models were validated by SAVES and Ramachandran plot (Supplementary Fig. 2 A and B), which showed most of the residues in allowed regions. Our structural prediction suggested first 10 amino acids of RKR motif to form a  $\alpha$ -helix whereas the PIP motif of p12 forms a typical  $3_{10}$  helix, the structure that snugly fits into the IDCL domain of PCNA. The p12 PIP structure was further aligned with available X-ray crystal structures of PIP peptide from p21 (1AXC) and p68 (1U76). The superimposition shows a high degree of similarity between the PIP motifs (Fig. 4 C). Similarly, p12 peptide structure was aligned with that of p68 PIP-hPCNA co-crystal structure, and a remarkable overlapping between the structures was observed (Fig. 3 C). Thus, our *in silico* analysis indicated that the C-terminal PIP sequence  $_{98}\text{QCSLWHL Y}_{105}$  is the most probable motif to interact with PCNA than the N-terminal RKR motif  $_{4}\text{KRLITDSY}_{11}$ .

To provide experimental evidence to our *in silico* prediction, two p12 mutants were generated by mutating R3, K4, R5 and L104, Y105 to alanines; and their binding to wild type p12 and PCNA were analyzed by yeast two hybrid approach (Fig. 3 D). As depicted, while transformants of BD-p12 with AD-p12 or AD-PCNA grew on SDA plate lacking leucine, tryptophan and histidine amino acids (rows 5 and 6); both R3A, K4A, R5A and L104A, Y105A p12 mutants failed interact with PCNA and thus no growth was observed (rows 2 and 4) similar to the vector control (row 7). Interestingly, R3A, K4A, R5A mutant is also defective in p12 interaction in yeast cells but not the L104A, Y105A mutant (compare row 1 with 3). These *in vivo* results suggest that while RKR-motif plays a dual role in dimerization and PCNA interaction,  $_{98}\text{QCSLWHL Y}_{105}$  is only involved in PCNA binding.

Further, we wanted to examine whether dimerization of p12 is also required for other Pol $\delta$  subunit interactions. Yeast two hybrid analyses of co-transformants harboring AD-R3A, K4A, R5A with BD-p125 or BD-p50 demonstrated that mutation in this motif has no effect on Pol $\delta$ 's subunit interaction as transformants grew efficiently on Leu- Trp- His- plate (Fig. 3 D, sectors 8-12). Thus, dimerization of p12 is not required for p125 or p50 binding. However, it is not clear whether p125 and p50 bind to the same or different regions in p12. Analyses of various deletion constructs in p12 did not reveal any significant results to suggest any interaction domain (data not shown). Nonetheless, dimerization will facilitate binding of p125 and p50 subunits of Pol $\delta$  to separate monomer of p12 dimer.

### **RKR-motif of p12 is critical for dimerization**

Multiple basic amino acid motifs such as RKR/KKR/KRK in other proteins are known to play crucial roles in a variety of cellular processes such as their retention and exit from ER, nuclear localization as well as



the gating of K<sup>+</sup> channels (29-32). Such motifs are also found to be involved in protein-protein interaction (33-35). To ensure the involvement of RKR-motif in p12-p12 dimerization, mutant proteins R3A, K4A, R5A and L104A, Y105A were purified to near homogeneity and analyzed in SDS-PAGE (Supplementary Fig. 3 lanes 3 and 4). The mutant proteins were co-migrated with the wild type p12 close to the dye front and thus mutations in these residues had no obvious effect on protein mobility and stability. When the proteins were further resolved in non-denaturing PAGE, both wild type and L104A, Y105A proteins were co-migrated; and their migration was similar to CA as shown earlier (Fig. 4 A, compare lanes 1 with 2 and 4). However, R3A, K4A, R5A mutant p12 was migrating much faster than the other two p12 proteins in native gel as a monomer (Fig. 4 B compare lane 3 with lanes 2 and 4). Therefore, we concluded that RKR motif is absolutely required for dimerization, and mutations in <sub>98</sub>QCSLWHL<sub>Y105</sub> motif have no effect on such a function of p12.

To rule out the possibility that the faster migration of RKR mutant in non-denaturing gel is not due to because of change in residual charge in the protein rather due to abolition of dimerization, we compared the gel filtration elution profiles of wild type and R3A, K4A, R5A mutant p12 by separating equal amount of proteins through S<sub>200</sub> molecular exclusion chromatography at physiological salt concentration. While the wild type p12 protein eluted in two peaks of volume at ~1.4 ml and ~2.2 ml corresponding to an oligomeric and monomeric status of the protein (red line), R3A, K4A, R5A mutant only eluted (grey line) later at a single peak volume of ~2.2 ml (Fig. 4 B). This also rules out any change in stokes radius of p12 proteins due to mutation in the dimerization domain as a portion of wild type co-elutes with mutant p12.

Co-immunoprecipitation experiment was also carried out in the cell lysates harboring FLAG-p12 and GFP-p12 or GFP-p12 R3A, K4A, R5A by using anti-FLAG antibody conjugated beads; and further probed with anti-GFP antibody (Fig. 4 C). While anti-FLAG antibody could pull down wild type p12 as detected by anti-GFP antibody, it did not precipitate the RKR mutant (compare lane 3 and 5). Corroborating with our yeast two hybrid results, native PAGE, size exclusion chromatography and pull-down assays clearly demonstrate that indeed RKR-motif is a protein-protein interaction domain and is essential for p12 dimerization.

### **Formaldehyde cross-linking reveals dimerization of p12**

Our native PAGE and ITC analyses suggested potential dimeric nature of p12 as it was migrating at similar position with CA (30 kDa). To estimate the exact number of p12 molecules in the oligomeric complex, we employed formaldehyde cross-linking assay. Reagents like formaldehyde or glutaraldehyde cross-links neighboring lysine or arginine residues of proteins to form a stable complex that can even withstand SDS



(36,37); moreover, our mutational analysis deciphered the involvement of RKR motif in dimerization. Therefore, purified recombinant proteins were cross-linked with formaldehyde, analyzed on 12 % SDS-PAGE and detected by Coomassie brilliant blue staining (Fig. 5 A). Upon treatment with the cross-linker, both wild type and L104A, Y105A mutant p12 proteins showed a concentration dependent cross-linked dimers (lanes 2, 3, 4, 10, 11 and 12) those were migrating below 32 kDa position and did not form any higher order oligomers, whereas R3A, K4A, R5A mutant protein remained as monomer (lanes 6, 7 and 8). Without any cross linker, all the three proteins migrated at the bottom of the gel (lanes 5, 9 and 13). In addition to <sub>3</sub>RKR<sub>5</sub> motif, p12 also possess yet another similar multi-basic motif <sub>15</sub>KKR<sub>17</sub> in only mammalian p12 (Fig. 3 A colored in blue). As R3A, K4A, R5A p12 mutant failed to form any oligomer in the presence of formaldehyde, we suggest that <sub>15</sub>KKR<sub>17</sub> sequences has no role in such a function and dimerization is specifically mediated by R<sub>3</sub>K<sub>4</sub>R<sub>5</sub> motif.

Since, we did not detect dimerization of RKR-motif mutant in any of our assay, we wanted to rule out the possibility that this effect resulted from a significant change in p12 conformation. For this reason, we compared the CD spectra of the wild-type and R3A, K4A, R5A mutant p12 proteins (Fig. 5 B). The CD spectra determined in the “far-UV” region (200 to 260 nm) showed p12 to be enriched in  $\alpha$ -structure as evident from the characteristic negative peaks at 208 nm and 222 nm. It also indicates that the mutant protein retains similar level of secondary structures as that of wild-type protein, which would suggest that the mutations do not cause a major perturbation of p12 structure. Even the ITC assays failed to detect any binding between wild type p12 and R3A, K4A, R5A p12 mutant (Fig. 1 C ii and D ii). Considering all these evidences, we conclude that p12 forms a dimer solely mediated by R<sub>3</sub>K<sub>4</sub>R<sub>5</sub> motif.

### ***In vitro* reconstitution of pentameric human Pol $\delta$ holoenzyme**

Various subassemblies of human Pol $\delta$  such as p125 alone, p125-p50, p125-p50-p68, and p125-p50-p68-p12 have been purified *in vitro* by mixing various combination of purified proteins (11,38). In this study, Pol $\delta$  holoenzyme was expressed by co-transforming two bacterial expression constructs GST-p125 and pCOLA234 (p50-p68-His-Flag-p12); and complex was purified to near homogeneity as described in the methods section. Taking advantage of strategically located PreScission protease site, cleaved Pol $\delta$  complex was obtained in which only p12 subunit was amino-terminally FLAG tagged. To conclusively show two different forms of p12 in the holoenzyme, untagged p12 protein purified from bacterial GST-p12 system was added and the mixture was further incubated at 4 °C for 4 hrs. If p12 forms a dimer and exist in the Pol $\delta$  complex, untagged p12 will compete out some of the Flag p12 and a Pol $\delta$  with five subunits will be appeared. Thus, the mixture was loaded into S<sub>200</sub> minicolumn for separation and fractions were collected in a 96 well plate. Since we could not detect enough protein by coomassie staining despite our repeated trails,

various fractions were analyzed in SDS-PAGE followed by detection of various subunits by probing with specific antibody (Fig. 6). To detect the presence of enriched holoenzyme fractions, the membrane was first probed with anti-p68 antibody (A) and further selected fractions were again separated in SDS-PAGE (B). As depicted in the figure, initial fractions were enriched in Pol $\delta$  holoenzyme (A8-B2) and a clear shift of untagged p12 proteins was also detected. Interestingly, early fractions such as A8-A10 only showed majority of Flag-p12 and very little amount of untagged p12 ; whereas the later fractions convincingly showed presence of both tagged and untagged p12 subunits (A12-B2); it suggests that early eluate are also pentameric complex. In this approach, we could purify two populations of Pol $\delta$ ; (a) early Pol $\delta$  fractions containing dimeric FLAG-p12 (A8-A10) and (b) later Pol $\delta$  fractions where some of the FLAG-p12 were replaced with untagged p12 (A12-B2). This analysis also indicates that earlier reported purified Pol $\delta$  holoenzyme could very well be Pol $\delta$  complex (11,15,23,24,39). Considering our both *in vivo* and *in vitro* analyses, we conclude that intrinsically human Pol $\delta$  is a pentameric complex possessing two p12 subunits.

### **Dimerization of p12 is essential for PCNA interaction**

Since, both R<sub>3</sub>K<sub>4</sub>R<sub>5</sub> and <sub>98</sub>QCSLWHL<sub>Y105</sub> motifs are involved in PCNA interaction and the former motif additionally involved in protein dimerization; to ascertain any regulatory role of this motif in p12 function, a PCNA overlay experiment was carried out. Proteins were resolved on native PAGE to keep the natural folding and dimer structure intact as in Fig. 4A, transferred to PVDF membrane and blocking was performed in the presence of PCNA. After several washings, the blot was developed with anti-PCNA antibody (Fig. 7 A). As depicted in the figure, although p12 and its L104A, Y105A mutant formed dimers (upper panel, compare lane 1 and 3), signal for only wild type was detected (lower panel) suggesting that <sub>98</sub>QCSLWHL<sub>Y105</sub> motif is a true PIP motif required for PCNA interaction. Despite retaining PIP motif in the extreme c-terminal tail, due to its inability to form dimer, R3A, K4A, R5A mutant failed to bind to PCNA. Similarly, a pull down experiment was also carried out by taking a mixture of stoichiometric equivalents of purified GST-p12 or various p12 mutants and PCNA in Tris-buffer containing 150 mM NaCl salt concentration (Fig. 7 B). The mixture was incubated with GST-beads at 4 °C for 3 hrs in rocking condition, further beads were washed thrice and bound PCNA was eluted by SDS containing sample buffer. The eluted PCNA was detected by anti-PCNA antibody only when it was mixed with wild type p12 but not with L104A, Y105A or R3A, K4A, R5A mutant (compare lane 3 with 6 and 9).

To determine the binding affinity of p12 with PCNA, ITC assay was carried out by placing p12 (10  $\mu$ M) in the sample cell and PCNA (120  $\mu$ M) was injected. The  $\Delta H$  was  $\sim -80$  kcal/mol,  $\Delta G$  was  $\sim -6.80$  kcal/mol, and the  $K_D$  for the complex was 10  $\mu$ M (Fig. 7 C). In similar assay condition, no significant heat exchange was observed while RKR- or PIP- motif p12 mutants was kept in the cell and PCNA in the

syringe, suggesting no interaction between the proteins. Thus, our results suggest that dimerization at R<sub>3</sub>K<sub>4</sub>R<sub>5</sub> motif promotes p12 interaction with PCNA via <sub>98</sub>QCSLWHL<sub>Y105</sub> motif.

### **Inter-domain connecting loop region of hPCNA mediates its interaction with p12**

In view of the fact that our predicted model structure showed p12 PIP peptide binding to IDCL domain of hPCNA; for confirmation, yeast two hybrid assay was carried out with p12 fused to Gal4 binding domain and two PCNA mutants namely, pcna-79 and pcna-90 fused to Gal4 activation domain. In pcna-79, two key hydrophobic residues L126 and I 128 of inter-domain connecting loop were mutated to alanines; whereas pcna-90 possesses two mutation P253,K254-AA in the extreme C-terminal tail of PCNA. Most of the interacting proteins bind to any of this two region of a trimeric PCNA ring (37). While wild type and pcna-90 were able to interact with p12 as evident from growth on SDA plate lacking leucine, uracil and histidine (Fig. 8 A, sectors 1 and 3); pcna-79 did not support the survival as it failed to form intact Gal4 by interacting with p12 (sector 2). p12 PIP mutant was used as a –ve control (sector 4). To strengthen our finding, GST pull down assay was carried out. Equal stoichiometry of wild type and IDCL mutant of PCNA proteins were incubated with GST-p12, and pull-down assays were performed on glutathione-Sepharose affinity beads as described previously (39). In accordance with the data shown in Fig. 8 B, while GST-p12 was able to pull down most of the wild type PCNA from solution (compare lane 1 with 3), it failed to bind pcna-79 protein (compare lane 4 with 6) as detected by anti-PCNA antibody.

### **Cdm1, a p12 homologue of *Schizosaccharomyces pombe* also forms dimer**

The other fourth subunit of DNA polymerase delta that has been well characterized is Cdm1, a p12 orthologue from *S. pombe* (10). Cdm1 consists of 160 amino acids, MW of 18.6 kDa and pI of 7.73. Like p12, it shows abnormal mobility in the SDS PAGE and migrates as ~22 kDa protein (Fig. 9 A). As it also has conserved RKR-motif (K<sub>2</sub>K<sub>3</sub>R<sub>4</sub>in Cdm1) at its N-terminal end, we wanted to examine whether homodimerization property of the smallest subunits of Polδ is evolutionarily conserved. Wild type and K2A, K3A, R4A mutant Cdm1 proteins were purified to near homogeneity from bacterial over-expression systems and analyzed on native PAGE. Just like p12, the wild type Cdm1 migrated slower than its mutant. The slower migration of Cdm1 complex comparison to p12 dimer could be attributed to the differences in their pI and MW (pI 7.3 vs 6.3; MW 12 vs 18.6). The dimeric p12 incidentally migrates at about the same position with monomeric Cdm1 mutant protein (Fig. 9 B). Thus, we concluded that homodimerization is the intrinsic property of the 4<sup>th</sup> subunits of Polδ and is mediated by a stretches of conserved basic amino acids located at the extreme amino terminal end (RKR/KKR-motif).

## Discussion:

DNA polymerase  $\delta$  is a high fidelity essential DNA polymerase not only plays a central role in DNA replication, it also participates in DNA recombination and several DNA repair pathways from yeasts to human (40,41). Several mutations in the mouse and human Pol $\delta$  subunits have been mapped to cause various cancers and genome instability in yeasts (42-44). Thus, it is important to understand function of each subunits and their precise role in processivity and fidelity of the holoenzyme. In this report, we have re-investigated role of the smallest subunit of hPol $\delta$ , p12 in holoenzyme architecture and PCNA interaction.

As reported earlier and also in this study p12 subunits interact with p125 and p50, whereas p50 makes a connecting bridge between catalytic p125 and accessory p68 subunits (45). Thus, hPol $\delta$  is proposed to be a heterotetrameric holoenzyme. Our yeast two hybrid assay, cellular co-localization in replication foci, mutational analyses and several physio-biochemical assays including formaldehyde crosslinking clearly demonstrate that p12 exists as a homodimer both *in vivo* and *in vitro*; and dimerization is dependent on amino terminal tripeptide basic amino acids sequence,  $_3\text{RKR}_5$ -motif. It also argues against the tetrameric nature hPol $\delta$ . As it has been previously shown, various sub-assemblies of hPol $\delta$  such as tri- and tetra-meric holoenzymes could exist in the cell based on Pol $\delta$ 's function in either replication or repair (46), we propose that in addition to these sub-complexes, pentameric Pol $\delta$  is also formed, which could be the native form of Pol $\delta$ . Pull-down of cellular Pol $\delta$  by a tagged p12 and *in vitro* reconstitution of Pol $\delta$ 5 definitely authenticates our prediction (Fig. 2 A and Fig. 7). Purification or *in vitro* reconstitution of Pol $\delta$  holoenzymes by several groups also indicated higher stoichiometry of p12 in comparison to other subunits in Pol $\delta$  (19,25,38,45-47). We also found that the dimerization of the 4<sup>th</sup> subunit of Pol $\delta$  is not restricted to human as Cdm1 of SpPol $\delta$  also forms a dimer that is again dependent on KKR motif. As the RKR/KKR motif has been retained in other p12 homologues as well, it appears that such a property of the smallest subunit of Pol $\delta$  is evolutionarily conserved. Interestingly, the small accessory subunit of yet another B-family polymerase Pol $\zeta$  (a complex of Rev3 and Rev7) Rev7 is found to function as a dimer (48). Thus, subunit dimerization of B-family DNA pols could be an intrinsic property; and it will be advantageous for the DNA polymerases to establish multiligand interactions during replication.

Most of the PCNA interacting partners including Pol $\delta$  bind to PCNA through a structurally conserved canonical PIP sequences (49). The PIP sequences structurally organized into a  $3_{10}$  helix that functions as a “hydrophobic plug” which fits into the IDCL domain of PCNA. The affinity of PIP sequences depend on how snugly the  $3_{10}$  helixes fit into the binding surface of PCNA. Previously, we have shown that all the three subunits of ScPol $\delta$  contribute to PCNA interaction as well as its processive DNA synthesis (5). The PIP motifs in Pol3, Pol31 and Pol32 have been mapped and each of them can bind to each monomer

of trimeric PCNA. The complication arises in hPol $\delta$  complex and it's not clear which subunits primarily contribute to PCNA interaction and processivity of the enzyme. Although, reports have shown that all the four subunits bind to PCNA and contribute enzymatic processivity to different degrees, identification of PIPs remains elusive (15). PIP motif in the largest subunit of hPol $\delta$ , p125 is yet to be deciphered. Like Pol32 subunit, p68 possesses a conventional PIP motif at the extreme carboxyl terminal end (49). Therefore, deletion of last 20 amino acids of p68 that encompass PIP sequences failed to bind to PCNA. Another study also revealed a mechanism that could modulate the interaction of p68 with PCNA by a protein kinase-mediated phosphorylation of Ser458 in the PIP-box  $_{456}\text{QVSITGFF}_{463}$ . Accordingly, it was proposed that phosphorylation/dephosphorylation of the PIP motif of p68 could provide a switch for the reorganization of replication proteins on the PCNA–Pol $\delta$  complex (50). Although the PIP-box is commonly found near the C-terminus, some proteins such as Pol31, RFC, DNA-cytosine-5-methyltransferase, and WRN DNA helicase, have internal or N-terminal PIP-boxes. Similarly, a PCNA interaction domain for p50 was identified at the N-terminus. A 22-amino acid oligopeptide containing the PIP sequence  $_{57}\text{LIQMRPFL}_{64}$  was shown to bind PCNA by far Western analysis (19,20); however, a mutational analysis in this motif to provide functional evidence is yet to be carried out. Crystal structure of p50 reveals that  $_{57}\text{LIQMRPFL}_{64}$  sequences belong to  $\alpha 2$  helix of the OB-fold generally involved in DNA binding and is quite different from the commonly found  $3_{10}$  helix structures in PIP motifs (51). Extensive biochemical studies have been carried out earlier to suggest that absence of p12 impedes processive DNA synthesis of Pol $\delta$ . Here, by using structural modeling, yeast two-hybrid system and many other biophysical and chemical studies we have mapped PIP motif of p12 at the C-terminal tail that forms a typical  $3_{10}$  helix that interacts with IDCL of PCNA. Additionally, we showed that while C-terminal motif  $_{98}\text{QCSLWHL}_{105}$  is a PIP motif that is directly involved in PCNA interaction, the N-terminal motif  $_{4}\text{KRLITDSY}_{11}$  is involved in dimerization and participates in regulating p12 interaction with PCNA. Contrary to earlier observation, our study reveals that the role of RKR-motif in PCNA interaction is mostly indirect (14). Thus, like phosphorylation/dephosphorylation of p68, dimerization could be yet another mode of regulation by p12 subunit to control switch in interacting partners by Pol $\delta$  with PCNA. In addition to dimerization, change in p12 protein turnover during genotoxic stress is yet another mode of Pol $\delta$  functional regulation (52,53).

There are sufficient evidences available both *in vitro* and *in vivo* to support an idea that multiple subassemblies of Pol $\delta$  may exist. Proteolysis of p12 and p68 subunits by human calpain-1 could trigger interconversion of Pol $\delta$  in the cell. Considering dimerization of p12 and purification of Pol $\delta 5$ , we propose existence of four different complexes of Pol $\delta$ ; Pol $\delta 5$  (p125+p50+p68+2xp12), Pol $\delta 4$  (p125+p50+p68+p12), Pol $\delta 3$  (p125+p50+p68), Pol $\delta 2$  (p125+p50) and p125 alone (Fig. 8 A). Depending upon the cellular contexts such as cells either actively replicating or under genomic stress, this

interconversion between the Pol $\delta$ s might be transpired. Pol $\delta$ 5 could be the major holoenzyme that takes part in DNA replication, which was earlier extensively studied as Pol $\delta$ 4. Pol $\delta$ 4 with a monomeric p12 may or may not exist in the cell. So, now instead of four subunits, five subunits of Pol $\delta$  should be considered that will interact with three available IDCL in the trimeric PCNA unless they use other binding sites such as inter-subunit junction or C-terminal domain of PCNA (54,55). Genetic analyses of Pol $\delta$  PIPs in *S. cerevisiae* revealed that for cell survival, along with Pol32 PIP, any one Pol3 or Pol31 PIP are essential. In the absence of functional Pol32 PIP domain, PIP domain mutation in Pol3 or Pol31 subunits causes lethality(5). Despite being structural subunits, CDC27 and p68, the Pol32 homologues are deciphered to be essential in *S. pombe* and mice, respectively (56); it explains their major role in Pol $\delta$ 's function in DNA synthesis. Binding affinity of Pol $\delta$  with PCNA also increases when p12 or p68 binds to the core ( $K_d$ = 8.7~9.3nM), and it further increases when all the subunits are present ( $K_d$ = 7.1nM). The  $K_d$  of Pol $\delta$  core is found to be 73 nM (45). Accordingly, the addition of p68/Pol32 to core (p125+p50 or Pol3+Pol31) results in high processivity, thus its binding to PCNA appears to be critical. Considering all these, we propose a model for the network of protein-protein interactions of the Pol $\delta$ -PCNA complex (Fig. 10). In a pentameric state of hPol $\delta$ , along with p68, any other two subunits among p125/p50/p12 will bind to PCNA in any combinations as shown in the figure 10 B (i to iv). Upon p68 degradation or its phosphorylation, p125, p50 and one monomer of p12 dimer can bind to PCNA (v). Similarly, upon p12 proteosomal degradation as a response to DNA damage; other three subunits will make contacts with PCNA (vi); whereas due to cleavage of both p68 and p12 in certain situation, p125 and p50 bind to PCNA (vii), although the Pol $\delta$  core functions with low processivity. Thus, this study warrants extensive mutational analyses as had been carried out in yeast Pol $\delta$  holoenzymes rather than analyzing sub-complexes to decipher precise role of these PIPs in cellular function and processive DNA synthesis by hPol $\delta$ .

In conclusion, here we show that RKR-mediated dimerization plays a vital role in p12 binding to PCNA and Pol $\delta$ 5 architecture, and the phenomenon appears to be conserved throughout evolution. Dimerization of p12 could play an instrumental role in re-orchestrating pentameric Pol $\delta$ -PCNA complex at the replication fork and thereby it regulates Pol $\delta$ 's function.

## Experimental Procedures:

**Plasmids, oligonucleotides, antibodies and enzymes:** Human DNA polymerase delta constructs pCOLA-hPol $\delta$ 234 and pET32-p125 (kind gift from Prof. Y. Matsumoto) were used as precursor plasmids for subsequent manipulation (57). The oligonucleotides (Supp. Table -1) from Integrated DNA Technologies (IDT, USA), Q5 high fidelity DNA polymerase and other restriction enzymes from NEB, and antibodies from Sigma or Abcam were procured. Human PCNA was directly amplified from c-DNA synthesized from



total RNA of HELA cell line by using primers NAP239 and NAP240, and cloned into pUC19 vector. PCR product was digested with BamHI and cloned into BglII site to generate a bacteria expression system of GST-fused hPCNA. To express in yeast, hPCNA was amplified by using primers NAP251 and NAP240, PCR product was digested with BamHI and cloned into same site of pGBT9 and pGAD424 to generate Gal4BD-hPCNA and Gal4AD-hPCNA, respectively. Inverse PCR was carried out using primer set NAP300-NAP304 on pUC19-hPCNA to generate pcna-79 (L126,128AA); and further subcloned into any expression vector. Human pcna-90 (P253A, K254A) was PCR amplified using primers NAP251 and NAP305 from pUC19-hPCNA template, PCR product was digested BamHI and cloned into same site of pUC19 and pGBT9. A GFP-fused hPCNA expression construct under CMV promoter was a gift from Prof. Wim Vermeulen.

Amplified PCR products of wild type, R3A, K4A, R5A; and L104A, Y105A mutants of p12 from pCOLA-hPold234 by using primer pairs NAP261-NAP262, NAP362-NAP261, and NAP265- NAP262, respectively; were digested with EcoRI-BamHI and cloned into same sites of pGBT9 and pGAD424. Similar PCR products amplified using primers NAP260-NAP261, NAP373-NAP261, and NAP265-NAP260 were also digested alone with BamHI and cloned into BglII site of either pNA716 or p3X Flag CMV7.1 vector to generate N-terminal GST tag proteins expressed under T7 promoter and N-terminal FLAG-tag human cell expression system, respectively. For Confocal microscopy and pull down studies, BamHI fragments of various p12 were subcloned into BamHI site of pcDNA-GFP vector. For RFP-fusion, p12 fragment and catalytic domain of Polθ were amplified with the primer sets NAP448-NAP450 and NAP444-NAP151, respectively; digested with EcoRI-BamHI and cloned into same sites of pASred2-c1 vector.

Other hPolδ subunits such as p125, p50 and p68 were also PCR amplified by the primer sets NAP252-NAP248, NAP254-NAP255, and NAP258-NAP257, respectively; digested with EcoRI-BamHI and cloned into same sites of pGBT9. Wild type and K2A, K3A, R4A mutant of Cdm1 were PCR amplified from *S. pombe* genomic DNA using primers NAP361-NAP451 and NAP361-NAP452, respectively; and the BamHI digested products were cloned into BglII site in pNA716 for bacterial expression. Similarly, GST-hp125 expression plasmid was generated by cloning a BamHI digested PCR product amplified from pET32p125 as a template using NAP247 and NAP248 primers into BglII site of pNA716. All of these constructs were authenticated by DNA sequencing.

**Protein Purifications:** All GST tagged proteins were expressed in *Escherichia coli* BL21 DE3 and purified by affinity chromatography using glutathione sepharose beads (GE-healthcare). The proteins were expressed as amino terminal GST- fusion proteins under T7 promoter. Briefly, 5 ml pre-culture of the



transformant was added to 500 ml LB + 50 µg/ml ampicillin and grown at 37 °C till the OD<sub>600</sub> reaches to 0.6. Next the culture was induced with 1 mM IPTG and allowed to grow for another 8 hrs. Cells were harvested and about 3 gm of frozen cells were resuspended in 1X cell breaking buffer (50 mM Tris–HCl pH 7.5, 10 % sucrose, 1 mM EDTA, 500 mM NaCl, 0.5 mM PMSF, 0.5 mM Benzamidine hydrochloride, 10 mMβ-mercaptoethanol and protease inhibitor cocktail). Cells were lysed with a high pressure homogenizer at 10K psi (STANSTED). The lysate was cleared after centrifugation at 10K rpm for 10 min. Further the supernatant was centrifuged at 30K rpm for 1 hour in P70AT rotor (Hitachi). Rest of the steps used for purification was same as described before (39). All the proteins were stored in the buffer containing final concentration of 50 mM Tris–HCl, pH 7.5, 150 mM NaCl, 10% glycerol, 5 mM dithiothreitol (DTT) and 0.01% NP-40. The purity of the protein was confirmed after resolving on 12 % SDS-PAGE and stained by Coomassie Blue.

However, for human Polδ purification, bacterial strain BLR (DE3) was co-transformed with pLacRARE2 plasmid from Rosetta2 strain (Novagen), GST-p125 and pCOLA-hPold234; and colonies were selected on LB agar plate containing ampicillin (50µg/ml), kanamycin (30µg/ml) and chloramphenicol (35µg/ml). About 60 ml overnight grown pre-culture was inoculated into 6 L LB with mentioned antibiotics and grown at 37 °C to an OD<sub>600</sub> of 0.6; followed by induction with 1 mM IPTG and further growth was continued for 15 hrs at 16 °C. The cells were harvested and stored at -80°C until use. The cell breaking condition and other purification steps were followed as mentioned. Taking advantage of strategically located PreScission protease site, cleaved Polδ4 (p125-p50-p68-p12) was obtained in which only p12 subunit was amino-terminally FLAG tagged. Similarly, p12 protein was also purified by using bacterial GST-p12 construct.

**Size exclusion Chromatography:** For size exclusion chromatography, about 10µg of each purified p12 proteins were loaded onto a Superdex 200 PC3.2/30 minicolumn pre-equilibrated with buffer containing 50mM HEPES pH7.5, 150 mM NaCl and 10% glycerol. Chromatography was performed on an AKTApure M system (GE Healthcare) at a flow rate of 0.05 ml/min at 4°C, and the absorbance was monitored at 280 nm.

**Purification of human Polδ5 complex:** In order to purify Polδ5 complex; purified Polδ4 (10µg) was mixed with equal amount of untagged p12 protein under rocking conditions for 4 hrs at 4°C. Then the mixture was injected in Superdex 200 PC3.2/30 minicolumn pre-equilibrated with buffer containing 50mM HEPES pH7.5, 150 mM NaCl and 10% glycerol. Chromatography was performed on an AKTApure M system (GE Healthcare) at a flow rate of 0.03 ml/min at 4°C, and the absorbance was monitored at 280 nm. The elute was collected in a 96 well plate fraction collector and then the various fractions were subjected to SDS-

PAGE and western blot for the detection of individual subunits of DNA polymerase delta. To check the presence of Pol $\delta$  fractionation, membrane was first probed with anti-p68 antibody (Cat # WH0010714M1) since it does not directly interact with p12 and will give a clear indication of the complex. Further, the enriched fractions were analyzed by probing with specific antibody such as anti-p125 (Cat # SAB4200053), anti-p50 (Cat# SAB4200054), and anti-p12 (Cat # WH0057804M1). Horseradish peroxidase-conjugated host specific secondary IgG (Cat# A90376154; Sigma –Aldrich and Cat# W402B, Abcam) was used to develop the blot by Chemidoc.

**Yeast two hybrid analyses:** The yeast two-hybrid analyses were performed using *HIS3* as a reporter system(39). The HFY7C yeast strain (from Clontech) was transformed with various combinations of the *GAL4* -AD (*TRP1*) and -BD (*LEU2*) fusion constructs. Co-Transformants were obtained on synthetic dropout (SD) media plates lacking leucine and tryptophan. In order to verify the interaction, transformants were grown on 5 ml YPD liquid medium over night at 30° and various dilutions were either streaked or spotted on Leu<sup>-</sup>Trp<sup>-</sup>His<sup>-</sup> selection medium. Further the plates were incubated for 2 days at 30 °C and photographed. Yeast transformants exhibiting histidine prototrophy are indicative of protein-protein interaction.

**Formaldehyde cross-linking:** About 1-5  $\mu$ g of native or mutant p12 in 20 mM HEPES buffer (pH 7.5) was mixed with 0.5% formaldehyde solution for 30 min at 25°C. The reaction was terminated by the addition of SDS sample buffer. Cross-linked proteins were resolved by electrophoresis in a 12 % SDS-PAGE. The gel was stained with coomassie blue.

**Native PAGE analysis:** Wild type and various mutants of p12 and Cdm1 proteins were mixed with DNA loading dye and were analyzed on 12 % Native PAGE. The gel was run at 80 volts for 5-15 hrs at 4°C using running buffer (25 mM Tris-base, 192 mM glycine, pH 8.8). The proteins were visualized by Coomassie Blue staining of the gels.

**Confocal Microscopy:** CHO cells were grown up to 70 % confluency on cover glass in DMEM media supplemented with 10% FBS and 1X penicillin-streptomycin antibiotics solution. Further the cells were washed with DPBS, pH 7.4 and then replaced with DMEM media containing 5 % FBS. These cells were co-transfected with GFP/RFP fusion constructs of p12, PCNA and a catalytic domain of Pol $\theta$  in various combinations as required by using Lipofactamine transfection kit as per the manufactures' protocol (Invitrogen). Further, cells were incubated at 37 °C with 5 % CO<sub>2</sub> and 95 % relative humidity. After 48 hrs, cell were thoroughly washed thrice with DPBS, fixed with ice cold 100 % methanol at -20 °C for 20 mins;

followed by rinsing with DPBS, pH7.4, and then slide were prepared using antifade as mounting agent. Images were taken using Leica TCS SP5 at 63 X objective.

**Co-immunoprecipitation:** HEK293 cells were grown up to 70% confluency in 10 cm dish containing DMEM media supplemented with 10% FBS and 1 X penicillin - streptomycin antibiotics. These cells were co-transfected with FLAG-p12 with either GFP-p12 or GFP-p12 R3A, K4A, R5A mutant by using Lipofactamine transfection kit. Cells were grown in humidified CO<sub>2</sub> incubator at 37°C. After 48 hrs growth, cell were harvested, washed thrice with DPBS and immediately resuspended in RIPA buffer (50 mM Tris-HCl pH 8.0, 0.5 % Sodium deoxycholate, 1000 mM NaCl, 0.1% SDS, 1mM EDTA, 1mM EGTA, 25 mM Sodium Pyrophosphate, 1 mM  $\beta$ -glycerophosphate, 1 mM sodium orthovanadate and protease inhibitor tablet) and kept for 1 hour at 4 °C rocking condition. Followed by centrifugation at 10000 rpm, the supernatant was collected and protein concentration was determined using Bradford method. About 500  $\mu$ g of total protein was incubated overnight with anti-FLAG antibody conjugated agarose beads. The beads were washed thrice with RIPA buffer and bound proteins were eluted by 40  $\mu$ l of SDS loading buffer and subjected to 12 % SDS PAGE. The proteins from the gel were transferred to PVDF membrane, followed by incubation of the membrane with 5 % skim milk in PBST for 1 hour at room temperature. The blot was washed thrice with PBST and incubated with anti-GFP antibody (1:5000 dilution, cat# ab290 from abcam) for 2 hours at RT. Subsequently, after through washings, horseradish peroxidase-conjugated goat anti-rabbit IgG (diluted 1:10000 in PBST, cat# A6154; Sigma -Aldrich) was used to develop the blot.

Similarly, native human Pol $\delta$  was co-immuno-precipitated from HEK293 cells transfected with GFP-p12. About 500  $\mu$ g of total protein was incubated overnight with anti-GFP or anti-p125 antibody conjugated agarose beads. The beads were washed thrice with RIPA buffer and bound proteins were eluted by 40  $\mu$ l of SDS loading buffer and subjected to 12 % SDS PAGE. The proteins from the gel were transferred to PVDF membrane, cut into 4 pieces as per the molecular weight markers, membranes were individually incubated with 5 % skim milk in PBST for 1 hour at room temperature. The blot was washed thrice with PBST and probed with subunit specific antibody for 2 hours at RT. For p50 probing, first the membrane was probed with anti-p50 antibody; then stripped off, and again probed with anti-GFP antibody as both the proteins migrate close to each other. Subsequently, after through washings, horseradish peroxidase-conjugated goat anti-IgG (diluted 1:10000 in PBST, cat# A6154; Sigma -Aldrich) was used to develop the blot.

**PCNA overlay Assay:** Various proteins were resolved in two 12 % Native PAGE and while one of the gel developed with Coomassie blue, other one was transferred to methanol activated PVDF membrane. The blot was first washed with BLOTTO (25 mM Tris-HCl, pH 7.4, 150 mM NaCl, 5 mM KCl, 5 % fat-free

milk, 1 % BSA, 0.05 % Tween 20) for 1 h at room temperature. Then, the blot was incubated overnight at 4 °C in 10 ug/ml of PCNA containing BLOTTO with constant agitation. After three rinses with BLOTTO, the membrane was incubated with anti-PCNA antibody (diluted 1:1000, cat#SAB2108448; Sigma-Aldrich) in BLOTTO. Subsequently, after through washings, horseradish peroxidase-conjugated goat anti-rabbit IgG (diluted 1:10000 in PBST, cat# A6154; Sigma -Aldrich) was used to develop the blot.

**GST pull down assay:** GST-wild type or LY 104,105 AA p12 protein bound glutathione sepharose beads was mixed with 0.5 µg of either wild type or mutant (L126A, I128A) human PCNA and pull down experiment was carried out using a standardized protocol described previously (39). Then the beads were thoroughly washed three times with 10 volumes of equilibration buffer (50 mM Tris-HCl, pH 7.5, 150 mM NaCl, 5 mM dithiothreitol, 0.01 % NP-40, 10 % glycerol). Finally, the bound proteins were eluted with 50 µl SDS loading buffer. Various fractions were resolved on a 12 % SDS-PAGE; this was followed by Western blot, similarly performed as in co-immunoprecipitation except that the primary antibody used is anti-PCNA antibody (cat#SAB2108448; Sigma-Aldrich) in 1:750 dilutions.

**Isothermal titration calorimetry:** The purified p12 and PCNA protein were dialyzed overnight in 1 liter of 150 mM sodium chloride and 20mM HEPES at pH 7.4 at 4°C. Final concentration of p12 was adjusted as 10 µM and PCNA as 120 µM. ITC were performed at 25°C using a Malvern MicroCal ITC calorimeter. The p12 was in the sample cell and the PCNA was in the syringe. Twenty five injections of the PCNA were done at intervals of 120 seconds and initial delay of 120 second. The data were analyzed to determine using a single-site binding model provided in the ITC analysis software package. Similarly, p12 oligomerization was checked by ITC at 30° C with twenty injections of protein.

**Circular Dichroism:** The purified p12 protein were dialyzed overnight in 1 liter of 20 mM sodium chloride and 20 mM HEPES at pH 7.4 at 4°C. The secondary structure of p12 and p12 R3A,K4A,R5A mutant were determined by circular dichroism (CD) spectroscopy using a ChiraScan applied photophysics. Spectra were taken at 25 °C in a 10 mm path length quartz cuvette containing the sample at concentrations of 0.2 mg/ml of protein in 20 mM HEPES buffer, pH 7.5, 20mM NaCl. The spectra were corrected for buffer. Mean residue ellipticity values were calculated using the expression  $[\theta] = \theta \times 100 / (c \times l \times n)$ , where  $\theta$  is the ellipticity (in millidegrees),  $c$  the protein concentration (in mol/liter),  $l$  is the path length (in cm), and  $n$  is the number of amino acid residues.

**In silico analysis of p12 structures:** p12 RKR (1-MGRKRLITDSYPVK-14) and PIP (92-GDPRFQCSLWHL YPL-106) domains were used for peptide structure prediction by using PEP-FOLD3 server (<http://bioserv.rpbs.univ-paris-diderot.fr/services/PEP-FOLD3/>). The models generated were validated by SAVES and Ramachandran plot showed all residues in allowed regions, validating both the models. Further, the generated structural models were aligned with PIP peptide sequences from p21 (1AXC) and p68 PIP (1U76).

## Acknowledgements

We are grateful to Profs. Y. Matsumoto and W. Vermeulen for providing us human Pol $\delta$  expression and CMV-GFP-hPCNA plasmids, respectively. We thank Sitendra Prasad Panda for his technical assistance, Dr. Jawed Alam for his involvement in initial studies, and Bhabani Shankar Sahoo for his help in confocal microscopy. Our laboratory colleagues are acknowledged for their thoughtful discussion. PK is a DBT-Senior Research Fellow; KM and DP are thankful to CSIR-SRF and DBT-RA fellowships, respectively. This work was supported by the intramural core grant from ILS, Bhubaneswar, India.

## Conflict of interest

The authors have no conflicts of interest.

## Author contributions

NA and PK designed the study; PK, DP and KM generated materials; PK carried out experiments; NA, PK, DP and KM analyzed the data and prepared the manuscript; NA conceptualized the study and acquired funding for the project. All the authors reviewed the results and approved the final version of the manuscript.

## References:

1. Pavlov, Y. I., Shcherbakova, P. V., and Rogozin, I. B. (2006) Roles of DNA polymerases in replication, repair, and recombination in eukaryotes. *International review of cytology* **255**, 41-132
2. Stillman, B. (2008) DNA polymerases at the replication fork in eukaryotes. *Molecular cell* **30**, 259-260
3. Kunkel, T. A., and Burgers, P. M. (2014) Delivering nonidentical twins. *Nature structural & molecular biology* **21**, 649-651
4. Johnson, R. E., Klassen, R., Prakash, L., and Prakash, S. (2015) A Major Role of DNA Polymerase delta in Replication of Both the Leading and Lagging DNA Strands. *Molecular cell* **59**, 163-175
5. Acharya, N., Klassen, R., Johnson, R. E., Prakash, L., and Prakash, S. (2011) PCNA binding domains in all three subunits of yeast DNA polymerase delta modulate its function in DNA replication.

- Proceedings of the National Academy of Sciences of the United States of America* **108**, 17927-17932
6. Waga, S., Bauer, G., and Stillman, B. (1994) Reconstitution of complete SV40 DNA replication with purified replication factors. *The Journal of biological chemistry* **269**, 10923-10934
7. Kunkel, T. A., and Burgers, P. M. (2008) Dividing the workload at a eukaryotic replication fork. *Trends in cell biology* **18**, 521-527
8. MacNeill, S. A., Baldacci, G., Burgers, P. M., and Hubscher, U. (2001) A unified nomenclature for the subunits of eukaryotic DNA polymerase delta. *Trends in biochemical sciences* **26**, 16-17
9. Miyabe, I., Kunkel, T. A., and Carr, A. M. (2011) The major roles of DNA polymerases epsilon and delta at the eukaryotic replication fork are evolutionarily conserved. *PLoS genetics* **7**, e1002407
10. Zuo, S., Bermudez, V., Zhang, G., Kelman, Z., and Hurwitz, J. (2000) Structure and activity associated with multiple forms of *Schizosaccharomyces pombe* DNA polymerase delta. *The Journal of biological chemistry* **275**, 5153-5162
11. Zhou, Y., Meng, X., Zhang, S., Lee, E. Y., and Lee, M. Y. (2012) Characterization of human DNA polymerase delta and its subassemblies reconstituted by expression in the MultiBac system. *PloS one* **7**, e39156
12. Johansson, E., Garg, P., and Burgers, P. M. (2004) The Pol32 subunit of DNA polymerase delta contains separable domains for processive replication and proliferating cell nuclear antigen (PCNA) binding. *The Journal of biological chemistry* **279**, 1907-1915
13. Bermudez, V. P., MacNeill, S. A., Tappin, I., and Hurwitz, J. (2002) The influence of the Cdc27 subunit on the properties of the *Schizosaccharomyces pombe* DNA polymerase delta. *The Journal of biological chemistry* **277**, 36853-36862
14. Li, H., Xie, B., Zhou, Y., Rahmeh, A., Trusa, S., Zhang, S., Gao, Y., Lee, E. Y., and Lee, M. Y. (2006) Functional roles of p12, the fourth subunit of human DNA polymerase delta. *The Journal of biological chemistry* **281**, 14748-14755
15. Lee, M. Y., Zhang, S., Lin, S. H., Chea, J., Wang, X., LeRoy, C., Wong, A., Zhang, Z., and Lee, E. Y. (2012) Regulation of human DNA polymerase delta in the cellular responses to DNA damage. *Environmental and molecular mutagenesis* **53**, 683-698
16. Lee, M. Y., Zhang, S., Lin, S. H., Wang, X., Darzynkiewicz, Z., Zhang, Z., and Lee, E. Y. (2014) The tail that wags the dog: p12, the smallest subunit of DNA polymerase delta, is degraded by ubiquitin ligases in response to DNA damage and during cell cycle progression. *Cell cycle* **13**, 23-31
17. Meng, X., Zhou, Y., Lee, E. Y., Lee, M. Y., and Frick, D. N. (2010) The p12 subunit of human polymerase delta modulates the rate and fidelity of DNA synthesis. *Biochemistry* **49**, 3545-3554
18. Krishna, T. S., Kong, X. P., Gary, S., Burgers, P. M., and Kuriyan, J. (1994) Crystal structure of the eukaryotic DNA polymerase processivity factor PCNA. *Cell* **79**, 1233-1243
19. Wang, Y., Zhang, Q., Chen, H., Li, X., Mai, W., Chen, K., Zhang, S., Lee, E. Y., Lee, M. Y., and Zhou, Y. (2011) P50, the small subunit of DNA polymerase delta, is required for mediation of the interaction of polymerase delta subassemblies with PCNA. *PloS one* **6**, e27092
20. Lu, X., Tan, C. K., Zhou, J. Q., You, M., Carastro, L. M., Downey, K. M., and So, A. G. (2002) Direct interaction of proliferating cell nuclear antigen with the small subunit of DNA polymerase delta. *The Journal of biological chemistry* **277**, 24340-24345
21. Zhang, P., Mo, J. Y., Perez, A., Leon, A., Liu, L., Mazloun, N., Xu, H., and Lee, M. Y. (1999) Direct interaction of proliferating cell nuclear antigen with the p125 catalytic subunit of mammalian DNA polymerase delta. *The Journal of biological chemistry* **274**, 26647-26653
22. Terai, K., Shibata, E., Abbas, T., and Dutta, A. (2013) Degradation of p12 subunit by CRL4Cdt2 E3 ligase inhibits fork progression after DNA damage. *The Journal of biological chemistry* **288**, 30509-30514



23. Rahmeh, A. A., Zhou, Y., Xie, B., Li, H., Lee, E. Y., and Lee, M. Y. (2012) Phosphorylation of the p68 subunit of Pol delta acts as a molecular switch to regulate its interaction with PCNA. *Biochemistry* **51**, 416-424
24. Fazlieva, R., Spittle, C. S., Morrissey, D., Hayashi, H., Yan, H., and Matsumoto, Y. (2009) Proofreading exonuclease activity of human DNA polymerase delta and its effects on lesion-bypass DNA synthesis. *Nucleic acids research* **37**, 2854-2866
25. Podust, V. N., Chang, L. S., Ott, R., Dianov, G. L., and Fanning, E. (2002) Reconstitution of human DNA polymerase delta using recombinant baculoviruses: the p12 subunit potentiates DNA polymerizing activity of the four-subunit enzyme. *The Journal of biological chemistry* **277**, 3894-3901
26. Essers, J., Theil, A. F., Baldeyron, C., van Cappellen, W. A., Houtsmuller, A. B., Kanaar, R., and Vermeulen, W. (2005) Nuclear dynamics of PCNA in DNA replication and repair. *Molecular and cellular biology* **25**, 9350-9359
27. Ducoux, M., Urbach, S., Baldacci, G., Hubscher, U., Koundrioukoff, S., Christensen, J., and Hughes, P. (2001) Mediation of proliferating cell nuclear antigen (PCNA)-dependent DNA replication through a conserved p21(Cip1)-like PCNA-binding motif present in the third subunit of human DNA polymerase delta. *The Journal of biological chemistry* **276**, 49258-49266
28. Pohler, J. R., Otterlei, M., and Warbrick, E. (2005) An in vivo analysis of the localisation and interactions of human p66 DNA polymerase delta subunit. *BMC molecular biology* **6**, 17
29. Zerangue, N., Schwappach, B., Jan, Y. N., and Jan, L. Y. (1999) A new ER trafficking signal regulates the subunit stoichiometry of plasma membrane K(ATP) channels. *Neuron* **22**, 537-548
30. Joiner, W. J., Wang, L. Y., Tang, M. D., and Kaczmarek, L. K. (1997) hSK4, a member of a novel subfamily of calcium-activated potassium channels. *Proceedings of the National Academy of Sciences of the United States of America* **94**, 11013-11018
31. Jones, H. M., Bailey, M. A., Baty, C. J., Macgregor, G. G., Syme, C. A., Hamilton, K. L., and Devor, D. C. (2007) An NH2-terminal multi-basic RKR motif is required for the ATP-dependent regulation of hIK1. *Channels (Austin)* **1**, 80-91
32. Fagerlund, R., Melen, K., Kinnunen, L., and Julkunen, I. (2002) Arginine/lysine-rich nuclear localization signals mediate interactions between dimeric STATs and importin alpha 5. *The Journal of biological chemistry* **277**, 30072-30078
33. Collins, P. E., Kiely, P. A., and Carmody, R. J. (2014) Inhibition of transcription by B cell Leukemia 3 (Bcl-3) protein requires interaction with nuclear factor kappaB (NF-kappaB) p50. *The Journal of biological chemistry* **289**, 7059-7067
34. van Hennik, P. B., ten Klooster, J. P., Halstead, J. R., Voermans, C., Anthony, E. C., Divecha, N., and Hordijk, P. L. (2003) The C-terminal domain of Rac1 contains two motifs that control targeting and signaling specificity. *The Journal of biological chemistry* **278**, 39166-39175
35. Wang, L., Zhang, K., Wu, L., Liu, S., Zhang, H., Zhou, Q., Tong, L., Sun, F., and Fan, Z. (2012) Structural insights into the substrate specificity of human granzyme H: the functional roles of a novel RKR motif. *Journal of immunology* **188**, 765-773
36. Naryzhny, S. N., Desouza, L. V., Siu, K. W., and Lee, H. (2006) Characterization of the human proliferating cell nuclear antigen physico-chemical properties: aspects of double trimer stability. *Biochemistry and cell biology = Biochimie et biologie cellulaire* **84**, 669-676
37. Manohar, K., and Acharya, N. (2015) Characterization of proliferating cell nuclear antigen (PCNA) from pathogenic yeast *Candida albicans* and its functional analyses in *S. Cerevisiae*. *BMC microbiology* **15**, 257
38. Xie, B., Mazloum, N., Liu, L., Rahmeh, A., Li, H., and Lee, M. Y. (2002) Reconstitution and characterization of the human DNA polymerase delta four-subunit holoenzyme. *Biochemistry* **41**, 13133-13142



39. Acharya, N., Haracska, L., Johnson, R. E., Unk, I., Prakash, S., and Prakash, L. (2005) Complex formation of yeast Rev1 and Rev7 proteins: a novel role for the polymerase-associated domain. *Molecular and cellular biology* **25**, 9734-9740
40. Burgers, P. M. (1998) Eukaryotic DNA polymerases in DNA replication and DNA repair. *Chromosoma* **107**, 218-227
41. Hindges, R., and Hubscher, U. (1997) DNA polymerase delta, an essential enzyme for DNA transactions. *Biological chemistry* **378**, 345-362
42. Albertson, T. M., Ogawa, M., Bugni, J. M., Hays, L. E., Chen, Y., Wang, Y., Treuting, P. M., Heddle, J. A., Goldsby, R. E., and Preston, B. D. (2009) DNA polymerase epsilon and delta proofreading suppress discrete mutator and cancer phenotypes in mice. *Proceedings of the National Academy of Sciences of the United States of America* **106**, 17101-17104
43. Flohr, T., Dai, J. C., Buttner, J., Popanda, O., Hagmuller, E., and Thielmann, H. W. (1999) Detection of mutations in the DNA polymerase delta gene of human sporadic colorectal cancers and colon cancer cell lines. *International journal of cancer* **80**, 919-929
44. Goldsby, R. E., Hays, L. E., Chen, X., Olmsted, E. A., Slayton, W. B., Spangrude, G. J., and Preston, B. D. (2002) High incidence of epithelial cancers in mice deficient for DNA polymerase delta proofreading. *Proceedings of the National Academy of Sciences of the United States of America* **99**, 15560-15565
45. Lee, M., Wang, X., Zhang, S., Zhang, Z., and Lee, E. Y. C. (2017) Regulation and Modulation of Human DNA Polymerase delta Activity and Function. *Genes* **8**
46. Zhang, Q., Zhang, Q., Chen, H., Chen, Y., and Zhou, Y. (2016) Multiple Forms of Human DNA Polymerase Delta Sub-Assembling in Cellular DNA Transactions. *Current protein & peptide science* **17**, 746-755
47. Zhou, Y., Chen, H., Li, X., Wang, Y., Chen, K., Zhang, S., Meng, X., Lee, E. Y., and Lee, M. Y. (2011) Production of recombinant human DNA polymerase delta in a Bombyx mori bioreactor. *PloS one* **6**, e22224
48. Rizzo, A. A., Vassel, F. M., Chatterjee, N., D'Souza, S., Li, Y., Hao, B., Hemann, M. T., Walker, G. C., and Korzhnev, D. M. (2018) Rev7 dimerization is important for assembly and function of the Rev1/Polzeta translesion synthesis complex. *Proceedings of the National Academy of Sciences of the United States of America* **115**, E8191-E8200
49. Bruning, J. B., and Shamoo, Y. (2004) Structural and thermodynamic analysis of human PCNA with peptides derived from DNA polymerase-delta p66 subunit and flap endonuclease-1. *Structure* **12**, 2209-2219
50. Lemmens, L., Urbach, S., Prudent, R., Cochet, C., Baldacci, G., and Hughes, P. (2008) Phosphorylation of the C subunit (p66) of human DNA polymerase delta. *Biochemical and biophysical research communications* **367**, 264-270
51. Baranovskiy, A. G., Babayeva, N. D., Liston, V. G., Rogozin, I. B., Koonin, E. V., Pavlov, Y. I., Vassilyev, D. G., and Tahirov, T. H. (2008) X-ray structure of the complex of regulatory subunits of human DNA polymerase delta. *Cell cycle* **7**, 3026-3036
52. Chea, J., Zhang, S., Zhao, H., Zhang, Z., Lee, E. Y., Darzynkiewicz, Z., and Lee, M. Y. (2012) Spatiotemporal recruitment of human DNA polymerase delta to sites of UV damage. *Cell cycle* **11**, 2885-2895
53. Fan, X., Zhang, Q., You, C., Qian, Y., Gao, J., Liu, P., Chen, H., Song, H., Chen, Y., Chen, K., and Zhou, Y. (2014) Proteolysis of the human DNA polymerase delta smallest subunit p12 by mu-calpain in calcium-triggered apoptotic HeLa cells. *PloS one* **9**, e93642
54. Eissenberg, J. C., Ayyagari, R., Gomes, X. V., and Burgers, P. M. (1997) Mutations in yeast proliferating cell nuclear antigen define distinct sites for interaction with DNA polymerase delta and DNA polymerase epsilon. *Molecular and cellular biology* **17**, 6367-6378

55. Gomes, X. V., and Burgers, P. M. (2000) Two modes of FEN1 binding to PCNA regulated by DNA. *The EMBO journal* **19**, 3811-3821
56. Murga, M., Lecona, E., Kamileri, I., Diaz, M., Lugli, N., Sotiriou, S. K., Anton, M. E., Mendez, J., Halazonetis, T. D., and Fernandez-Capetillo, O. (2016) POLD3 Is Haploinsufficient for DNA Replication in Mice. *Molecular cell* **63**, 877-883
57. Schmitt, M. W., Matsumoto, Y., and Loeb, L. A. (2009) High fidelity and lesion bypass capability of human DNA polymerase delta. *Biochimie* **91**, 1163-1172

## Abbreviations

Pol-DNA polymerase; PCNA- proliferating nuclear antigen; PIP- PCNA interacting peptide; SDS- Sodium dodecyl sulfate, PAGE-polyacrylamide gel electrophoresis; UV-ultra violet; HU-hydroxyurea; GFP-green fluorescence protein; RFP-red fluorescence protein, ER- endoplasmic reticulum; NLS- nucleus localizing signal.

## Figure Legends:

**Figure 1: Interaction of p12 with hPol $\delta$  subunits.** **A.** Yeast two hybrid analysis showing interaction of p12 with various subunits of hPol $\delta$ . HFY7C yeast transformants with various GAL4- AD and BD fusions were selected on SD media plates lacking leucine, tryptophan with and without histidine amino acids. Sector 1, AD-p12 + BD-p125; Sector 2, AD-p12 + BD-p50; Sector 3, AD-p12 + BD-p68; Sector 4, AD-p12 + BD-p12; Sector 5, AD-p12 + pGBT9; and Sector 6, AD-p12 + pGAD424. **B.** Purified p12 protein was resolved in native and SDS containing-PAGEs. Lane 1, MW; Lane 2 and 4, p12; Lane 3 and 5, Carbonic anhydrase. **C.** ITC analysis of p12 to wild type (i) or RKR-mutant p12 (ii) at 25°C. In each panel, the upper half shows the measured heat exchanges during each protein injection. The lower half of each panel shows the enthalpic changes as a function of the molar ratio of p12 to wild type or RKR mutant p12 monomer. Circles and lines denote the raw measurements and the fitting to a one set of identical sites.

**Figure 2: Existence of p12 dimers in the cellular context of Pol $\delta$ .** **A.** Native human Pol $\delta$  was co-immuno-precipitated from HEK293 cells transfected with GFP-p12. Either GFP-p12 (i) or p125 (ii) was used to immunoprecipitate cellular Pol $\delta$ . After thorough washings, eluate was separated in 12 % SDS-PAGE, and presence of various subunits of hPol $\delta$  was detected by subunit specific antibody. GFP-p12 was detected by anti-GFP antibody. **B.** Nuclear co-localization of p12 and PCNA. CHO cells were co-transfected with GFP-p12 and RFP-p12 (i) or GFP-PCNA and RFP-p12 (ii) or GFP-p12 and RFP-Pol $\delta$  (iii). After 48 hrs, cell were fixed and mounted as described in experimental procedures section and images were taken using Leica TCS SP5 at 63 X objective.

**Figure 3: Identification of p12 motifs involved in dimerization and PCNA interaction.** **A.** The primary sequences of the 4<sup>th</sup> subunit of Pol $\delta$ s from human (*Homo sapiens*), mouse (*Mus musculus*), bovine (*Bos Taurus*) and fission yeast (*Schizosaccharomyces pombe*) were aligned by CLUSTALW. Conserved dimerization motif and PIP-box sequences are colored brown. Secondary structure prediction showed coiled structures with three putative  $\alpha$  helices. Identical residues are marked with\*, conserved residues are marked with : and less conserved residues are marked with •. **B.** Identified PIP motif residues from DNA polymerase  $\eta$  and  $\delta$  subunits were aligned and compared that with putative PIP sequences in p12. Repeated residues in more than one sequences are highlighted. **C.** Superimposition of model 3<sub>10</sub> helix structure of p12 PIP (cyan) with available PIP structures from p21 (orange) and p68 (red) peptides without and with human PCNA monomer. **D.** Yeast two hybrid analysis showing interaction of mutants p12 with wild type p12 and PCNA. HFY7C yeast transformants with various GAL4- AD and BD fusions were selected on SD media plates lacking leucine, tryptophan with and without histidine amino acids. Row 1, AD-p12 + BD-p12 R3A, K4A, R5A; Row 2, AD-PCNA + BD-p12 R3A, K4A, R5A; Row 3, AD-p12 + BD-p12 L104A, Y105A; Row 4, AD-PCNA + BD-p12 L104A, Y105A; Row 5, AD-PCNA + BD-p12; Row 6, AD-p12 + BD-p12; Row 7, AD-p12 + pGBT9. Row 8, AD-p12 + BD-p125; Row 9, AD-p12 R3A, K4A, R5A + BD-p125; Row 10, AD-p12 + BD-p50; Row 11, AD-p12 R3A, K4A, R5A + BD-p50; and Row 12, AD-p12 + pGBT9.

**Figure 4: RKR-motif is involved in dimerization.** **A.** R3A, K4A, R5A and L104A, Y105A p12 proteins were resolved in native PAGE. Lane 1, CA; Lane 2, p12; Lane 3, R3A, K4A, R5A; and Lane 4, L104A, Y105A. \* represents degraded CA. **B.** About 10  $\mu$ g of wild type (red line) and R3A, K4A, R5A (grey line) p12 proteins were subjected to size exclusion chromatography. Two elution peaks at ~1.4 ml and ~2.2 ml were observed representing a dimer and monomer populations, respectively. **C.** Immunoprecipitation of GFP-p12 by FLAG-p12 (lane 3) but not of GFP- R3A, K4A, R5A mutant (lane 5). Lane 1, cell lysate input; Lanes 2 and 4 are washings from beads.

**Figure 5: Formaldehyde cross-linking of p12 proteins.** **A.** About 1-5  $\mu$ g of p12 proteins were cross linked with 0.5% formaldehyde solution for 30 min at 25°C. After termination with SDS sample buffer, they were resolved in a 12 % SDS-PAGE. Lane 1, MW; Lanes 2-5, p12; Lanes 6-9, R3A, K4A, R5A and Lanes 10-13, L104A, Y105A. Lanes 5, 9 and 13, proteins treated similarly but without formaldehyde. **B.** Far UV-CD spectra of wild-type (red) and R3A, K4A, R5A mutant (blue) p12. CD spectra at pH 7.5 between 200 nm and 260 nm were recorded. Data represent values determined after solvent correction and after averaging each set (n=3).

**Figure 6: Purification of pentameric hPolδ holoenzyme.** Schematic representation of purification of pentameric Polδ was shown. Mixture of Polδ4 and p12 was separated by gel filtration chromatography and various fractions was first analyzed by probing with anti-p68 antibody (**A**). Enriched fractions were again separated in SDS-PAGE, transferred to PVDF membrane. Membrane was cut into pieces as per the molecular weight of various subunits and were individually probed with specific antibody (**B**). Fractions possessing Polδ5 were denoted. Name of the fractions were as per the collections in 96 well plate.

**Figure 7: Mutations RKR motif inhibit binding with PCNA.** **A.** Upper panel depicting coomassie blue stained gel of various p12 proteins resolved in a non-denaturing condition; whereas lower panel is a far-Western analysis of similar gel. Proteins were transferred from the gel to the membrane and further the blot was blocked with PCNA. After washings, bound PCNA was detected by anti-PCNA antibody. Lane 1, wild type; Lane 2, R3A, K4A, R5A; and Lane 3, L104A, Y105A p12 proteins. **B.** GST-pull down of PCNA by wild type p12. Beads of GST-p12 (lanes 1-3) or GST- R3A, K4A, R5A (lanes 4-6) or GST-L104A, Y105A p12 mutants (lanes 7-9) were mixed with PCNA in equilibration buffer, after incubation beads were washed and bound PCNA was eluted by protein loading dye. Various fractions were resolved in 12 % SDS PAGE, blotted to the membrane and developed by anti-PCNA antibody. Lanes 1, 4 and 7 are 10 % of Load; Lanes 2, 5 and 8 are 10 % of third washings; Lanes 3, 6 and 9 are the total elutes. **C.** ITC analysis of binding of wild type (i) or R3A, K4A, R5A (ii) or L104A, Y105A mutant (iii) p12 to PCNA at 25°C. In each panel, the upper half shows the measured heat exchanges during each PCNA protein injection. The lower half of each panel shows the enthalpic changes as a function of the molar ratio of the two proteins where p12 was considered as a dimer and PCNA as a trimer.

**Figure 8: IDCL of hPCNA binding to p12.** **A.** Yeast two hybrid analysis showing interaction of PCNA with p12. HFY7C yeast transformants with various GAL4- AD and BD fusions were selected on SD media plates lacking leucine, tryptophan with and without histidine amino acids. Row 1, AD-PCNA + BD-p12; Row 2, AD-PCNA L126A, I128A + BD-p12; Row 3, AD-PCNA P253A, L254A + BD-p12; Row 4, AD-PCNA + BD-p12 L104A, Y105A. **B.** GST-pull down of PCNA by wild type p12. Beads of GST-p12 were mixed with wild type (lanes 1-3) or L126A, I128A mutant PCNA (lanes 4-6) in equilibration buffer, after incubation beads were washed and bound PCNA was eluted by protein loading dye. Various fractions were resolved in 12 % SDS PAGE, blotted to the membrane and developed by anti-PCNA antibody. Lanes 1 and 4 are 10 % of Load; Lanes 2 and 5 are 10 % of third washings; Lanes 3 and 6 are the total elutes.

**Figure 9: Cdm1 also dimerizes via KKR-motif and stability of the dimers.** **A.** Purity of wild type and K2A, K3A, R4A mutant Cdm1 proteins were analyzed in 12 % SDS-PAGE and their mobility was compared with p12 proteins. **B.** These proteins were further resolved in PAGE without SDS. Lane 1, p12; Lane 2, p12 with R3A, K4A, R5A mutations ; Lane 3, Cdm1; and Lane 4, Cdm1 with K2A, K3A, R4A mutations.

**Figure 10: Protein –protein network model for hPol $\delta$  and PCNA.** **A.** Depicting different sub-assemblies of Pol $\delta$  complexes. As p12 is a dimer, pentameric Pol $\delta$  holoenzyme is proposed to function in DNA replication. Pol $\delta$ 4 may or may not exist in the cell; however, after proteolysis during certain conditions like genomic stress; Pol $\delta$ 5 can be downgraded to Pol $\delta$ 3 or Pol $\delta$ 2 complexes. **B.** Four different proposed modes of Pol $\delta$ 5 binding to PCNA where apart from p68, any other two subunits can bind to IDCLs of PCNA. In dimerization state only p12 can bind to PCNA (i –iv). Upon phosphorylation of p68 or proteolysis of p12, other remained three subunits bind to PCNA (v and vi). In case of core, both subunits interact with PCNA but with compromised processive DNA synthesis. PCNA monomer binding to p125, p50, p68 and p12 are shown in blue, black, red and green dotted lines, respectively.

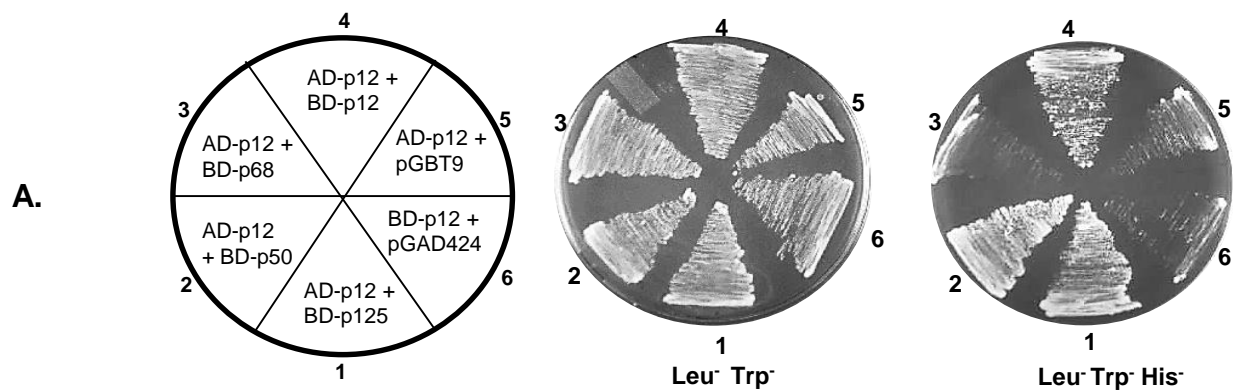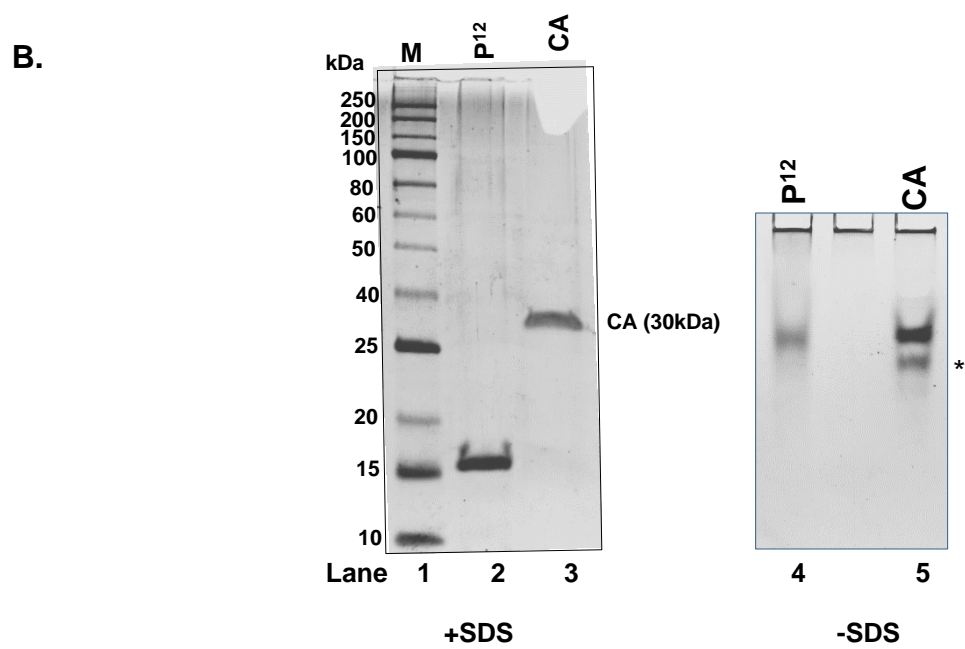

**Figure 1**

C.

i.

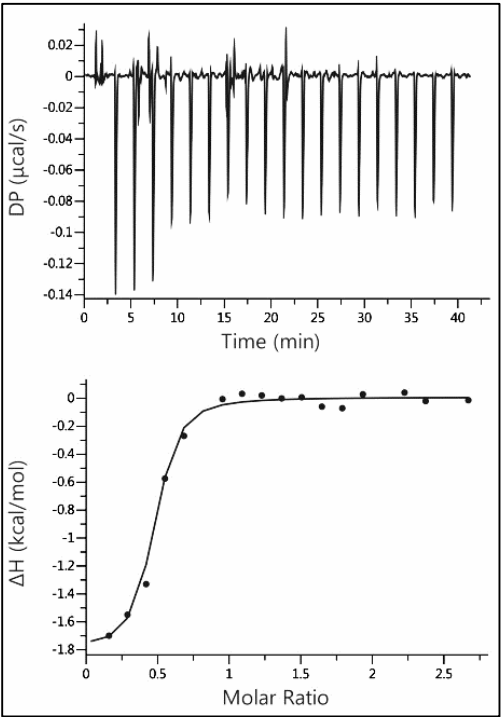

p12 Vs p12

ii.

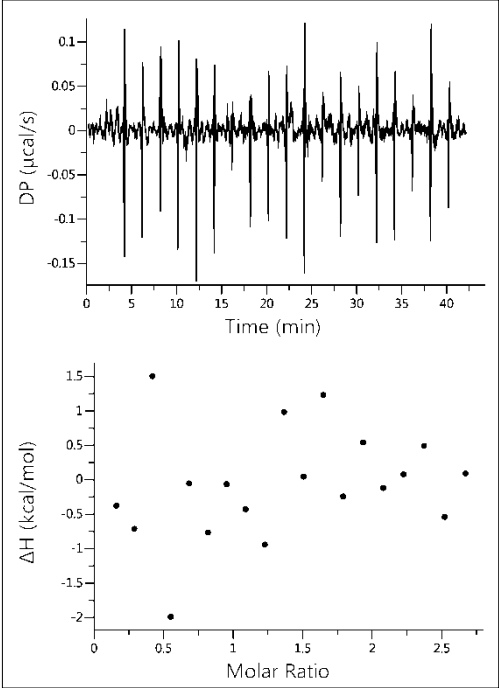

p12 Vs p12-R3A,K4A,R5A

Figure 1



**A.**      i. IP using anti-GFP-p12      ii. IP using anti -p125

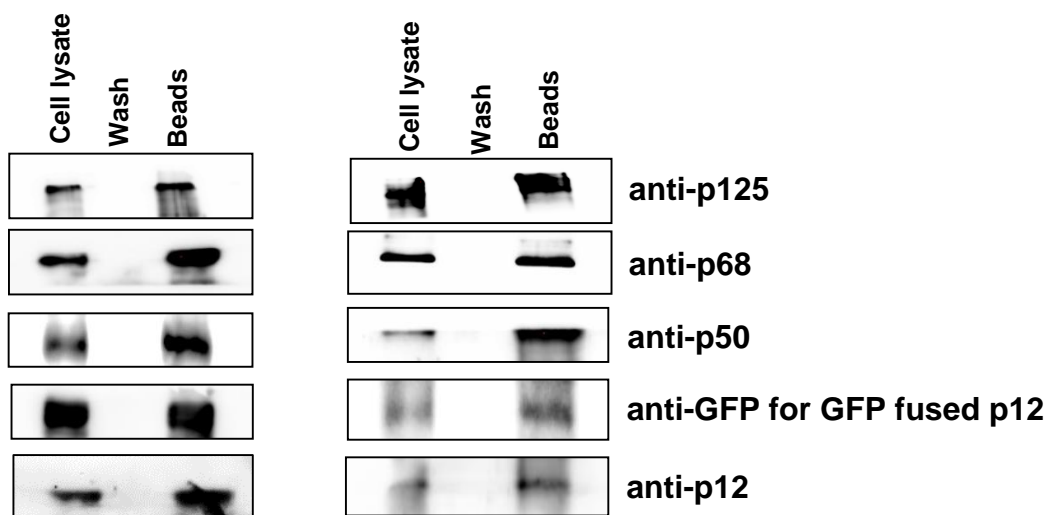

**B.**

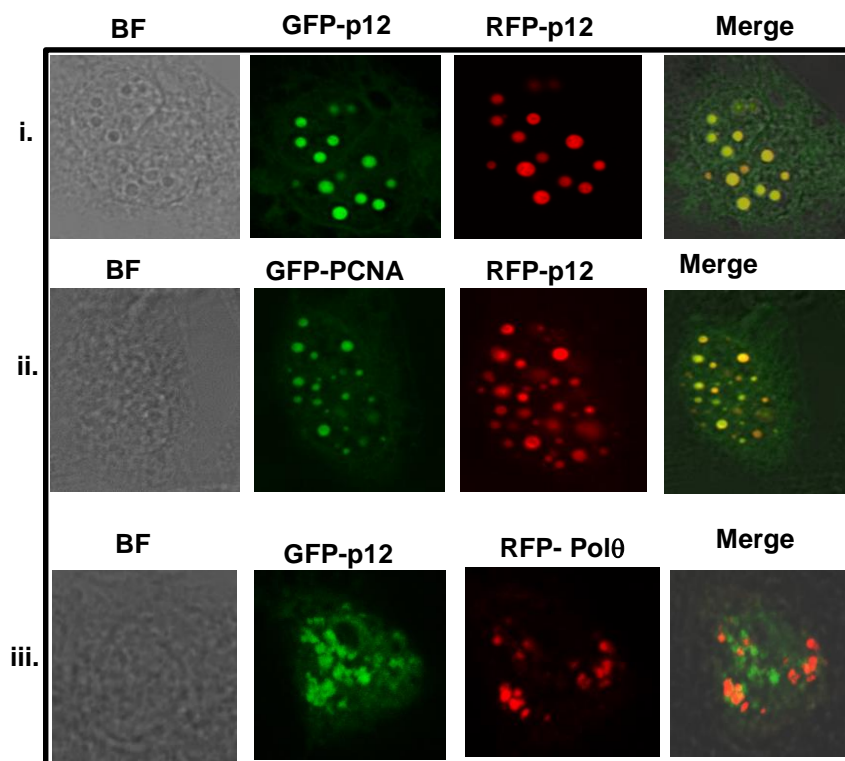

**Figure 2**

A.

|                    |      |              |                                                                                              | Dimerization motif                                           |                            |
|--------------------|------|--------------|----------------------------------------------------------------------------------------------|--------------------------------------------------------------|----------------------------|
| <i>M. musculus</i> | p12  | (1-32 aa)    | MGR <b>KRF</b> -----                                                                         | ITDSYPVV <b>K</b> REGPPGHSGKELAPEL-----                      |                            |
| <i>B. taurus</i>   | p12  | (1-32 aa)    | MGR <b>KRL</b> -----                                                                         | ITDSYPVV <b>K</b> REGSAGHSGKELAPDL-----                      |                            |
| <i>H. sapiens</i>  | p12  | (1-32 aa)    | MGR <b>KRL</b> -----                                                                         | ITDSYPVV <b>K</b> REGPAGHSGKELAPEL-----                      |                            |
| <i>S. pombe</i>    | Cdm1 | (1-60 aa)    | M- <b>KKR</b> TTQAKKSGQNTNIRDVFPHV <b>V</b> RSN <b>S</b> SQSHIGKKVSSEQSPTPDVTITTTKTLDERIKEDD |                                                              |                            |
|                    |      |              |                                                                                              | * : ** .                                                     | * * : : . * : : :          |
|                    |      |              |                                                                                              |                                                              |                            |
| <i>M. musculus</i> | p12  | (33-72 aa)   | -----                                                                                        | GEDTQSL <b>S</b> QEETEL <b>L</b> LRQFDLAWQYGPCTGITRLQRWSRAEQ |                            |
| <i>B. taurus</i>   | p12  | (33-72 aa)   | -----                                                                                        | GEEPLPLSVDEEEEL <b>L</b> LRQFDLAWQYGPCTGITRLQRWHRAEQ         |                            |
| <i>H. sapiens</i>  | p12  | (33-72 aa)   | -----                                                                                        | GEEPQPRDEEEAE <b>L</b> LRQFDLAWQYGPCTGITRLQRWCRAEQ           |                            |
| <i>S. pombe</i>    | Cdm1 | (61-120 aa)  | ELSKEVEEAWNQIMAERISEPIHCENITKVEFILHHFDTTARYGPYLG <b>M</b> TRMQRWKRAKN                        |                                                              |                            |
|                    |      |              |                                                                                              | . :                                                          | . : ** * : : * * : * * : * |
|                    |      |              |                                                                                              |                                                              |                            |
|                    |      |              |                                                                                              | PIP                                                          |                            |
| <i>M. musculus</i> | p12  | (73-107 aa)  | MGLKPPLEVYQVLKAHPEDPHF <b>QCSLWHLY</b> PL-----                                               | 107                                                          |                            |
| <i>B. taurus</i>   | p12  | (73-107 aa)  | MGLKPPPEVHQVLQSHPGDPRF <b>QCSLWHFY</b> PL-----                                               | 107                                                          |                            |
| <i>H. sapiens</i>  | p12  | (73-107 aa)  | MGLEPPPEVWQVLKTHPGDPRF <b>QCSLWHLY</b> PL-----                                               | 107                                                          |                            |
| <i>S. pombe</i>    | Cdm1 | (121-160 aa) | FNLNPPETVGKILMLEEADENRKRES <b>L</b> FYDLQ <b>T</b> IPG                                       | 160                                                          |                            |
|                    |      |              |                                                                                              | ..*:* * : : * . * . :                                        | : * *                      |

B.

|                |     |                 |      |
|----------------|-----|-----------------|------|
| ScPolδ- Pol13  | 995 | <b>KGGLMSFI</b> | 1003 |
| ScPolδ- Pol131 | 321 | <b>DKSLESYF</b> | 328  |
| ScPolδ- Pol132 | 331 | <b>QGTLESFF</b> | 347  |
| hPolδ- p68     | 456 | <b>QVSITGFF</b> | 463  |
| hPolδ- p50     | 57  | <b>LIQMRPFL</b> | 64   |
| hPolδ- P12     | 98  | <b>QCSLWHLY</b> | 105  |
| hPolδ- p12     | 4   | <b>KRLITDSY</b> | 11   |
| ScRad30-pip    | 618 | <b>SKNILSFF</b> | 625  |
| hRad30 pip2    | 437 | <b>STDITSFL</b> | 444  |
| hRad30 pip1    | 701 | <b>MQTLESFF</b> | 708  |

Consensus      **QXXLXXFF**

C.

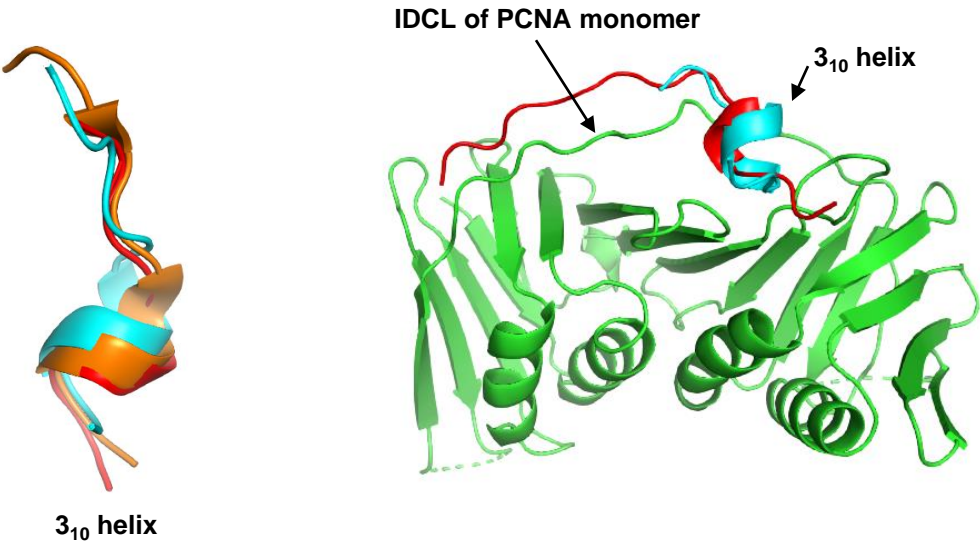

Figure 3

D.

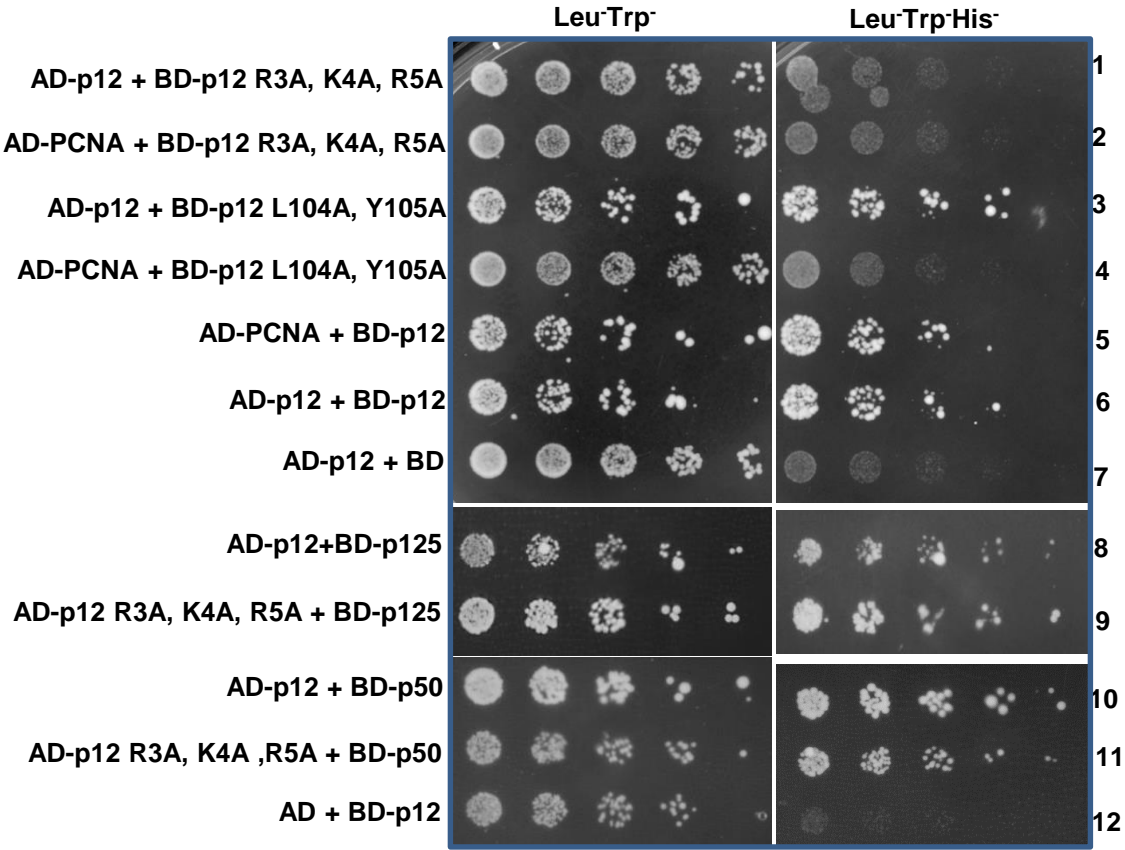

Figure 3

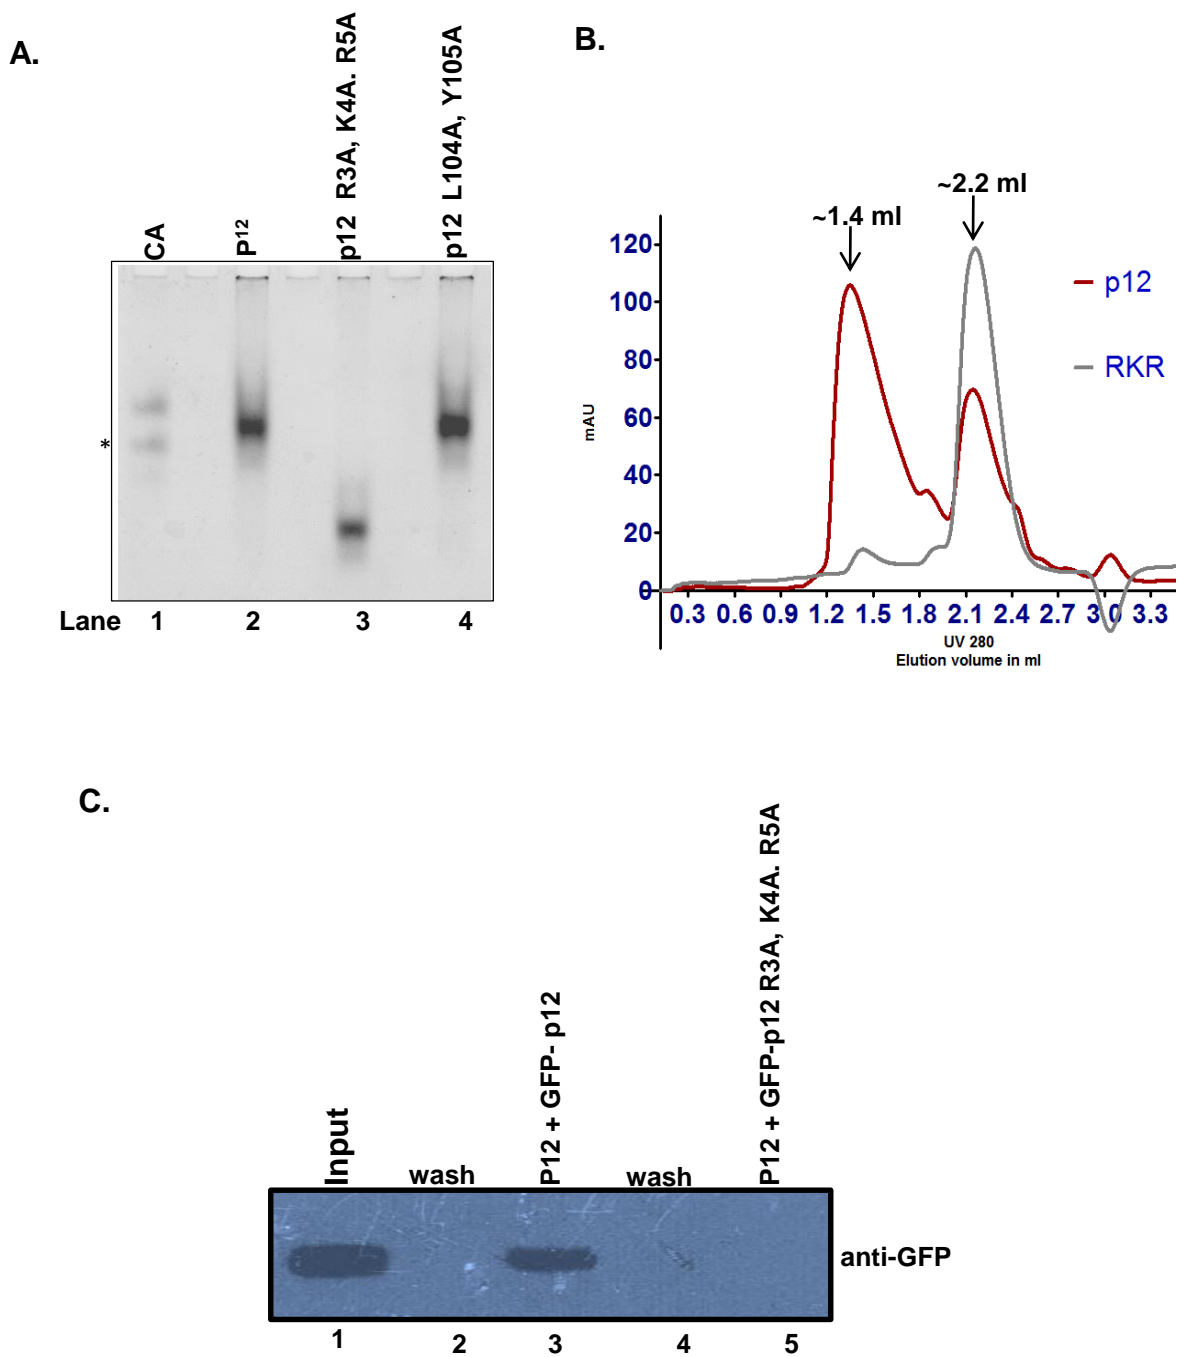

Figure 4

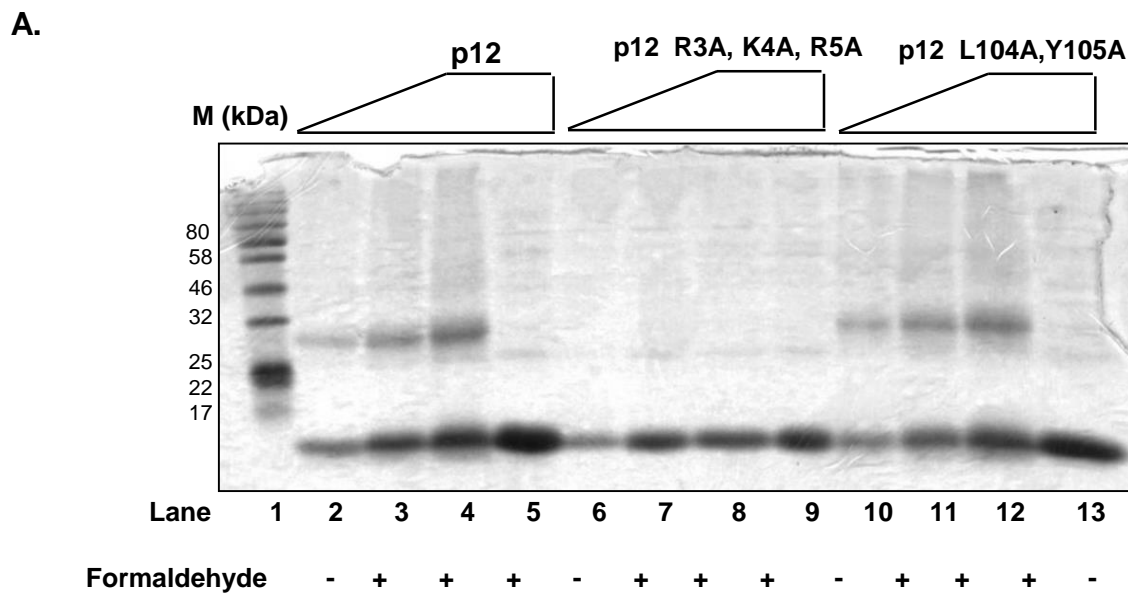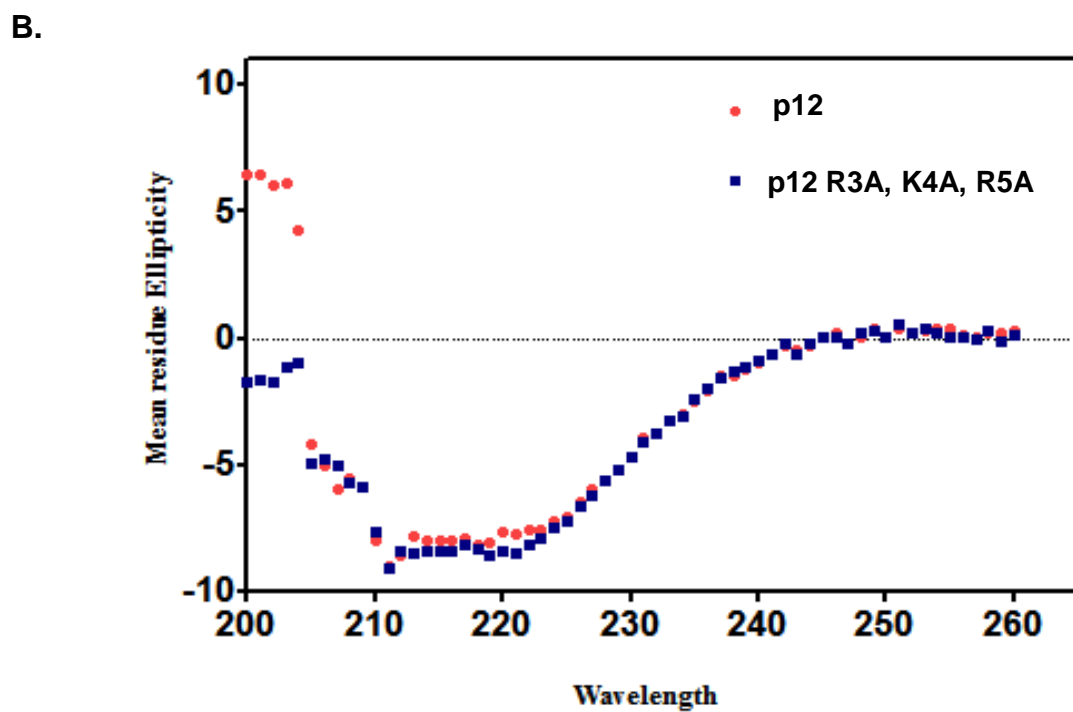

**Figure 5**

**A.**

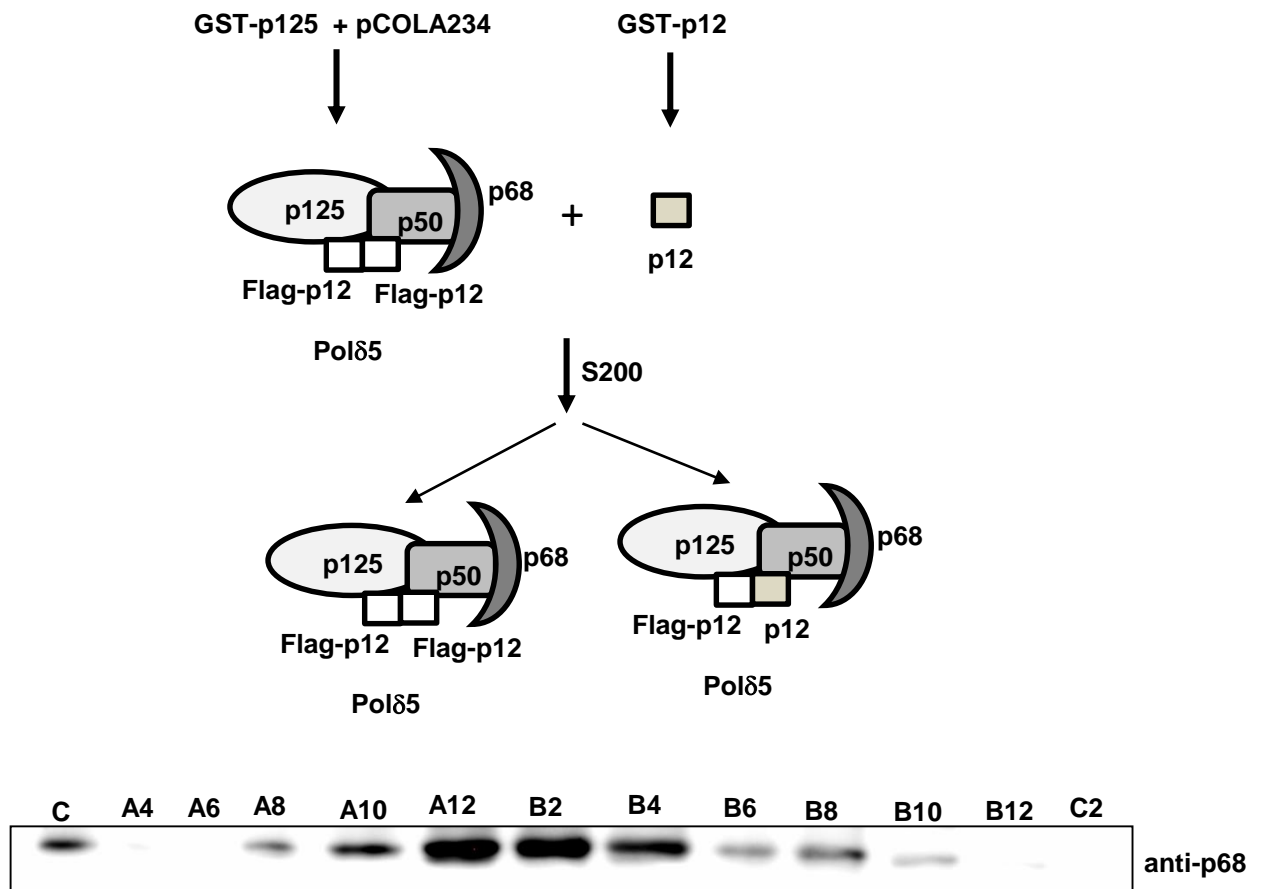

**B.**

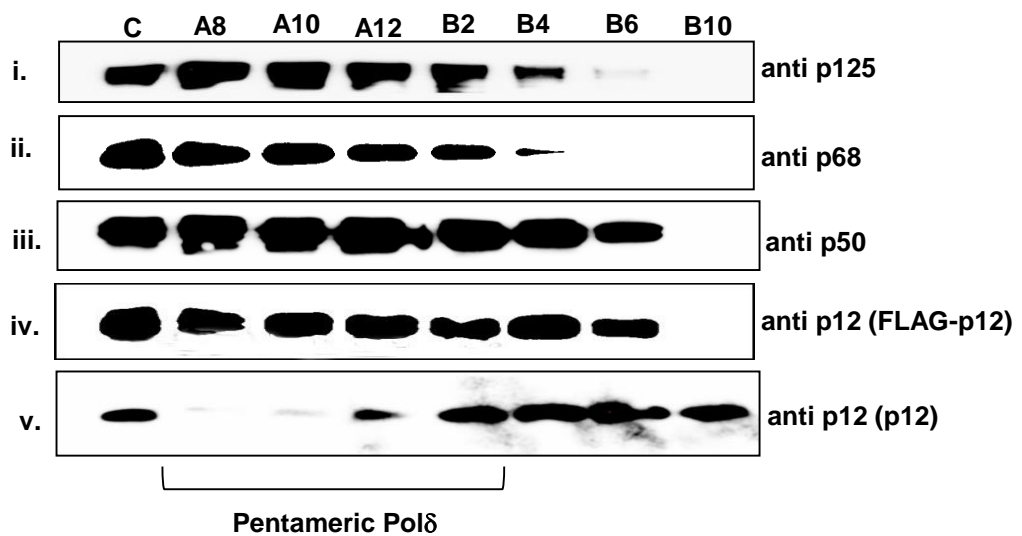

**Figure 6**

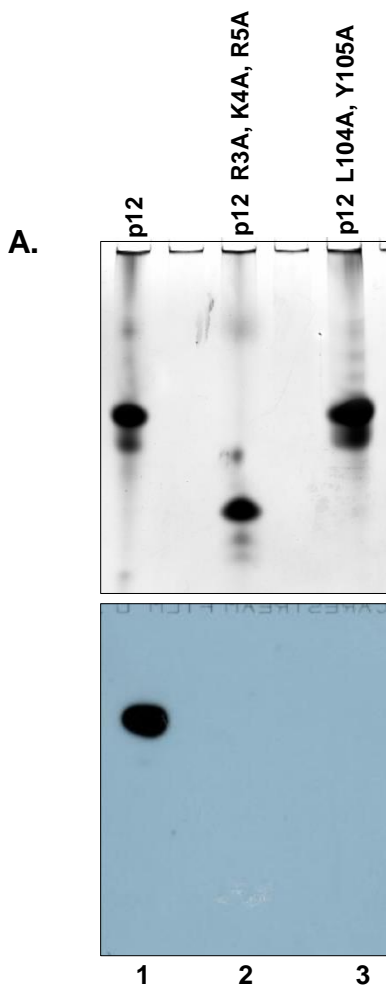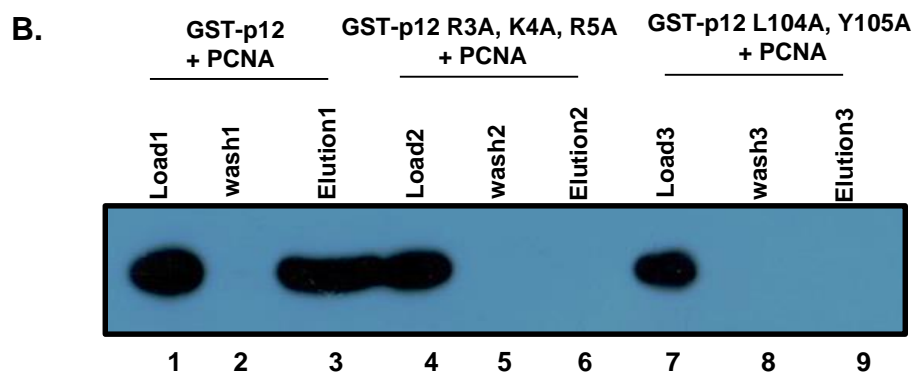

**Figure 7**



C.

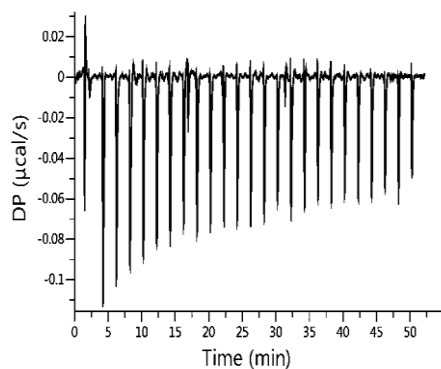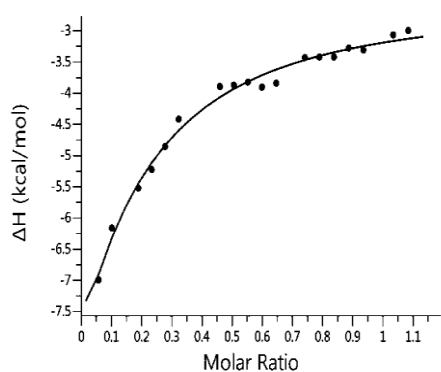

i. p12 and PCNA

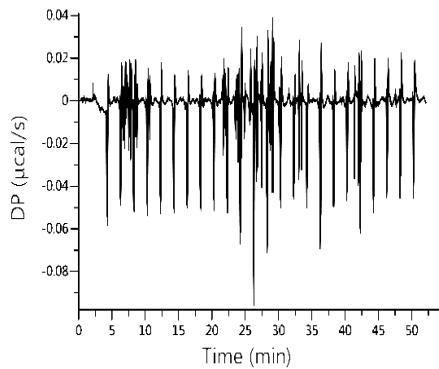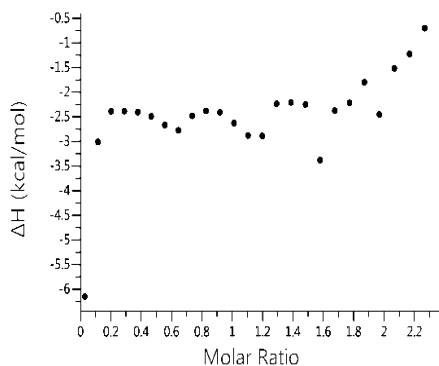

ii. p12 R3A, K4A, R4A and PCNA

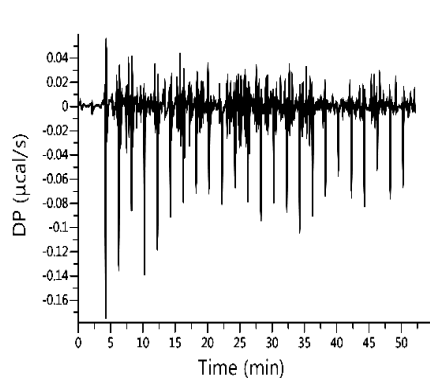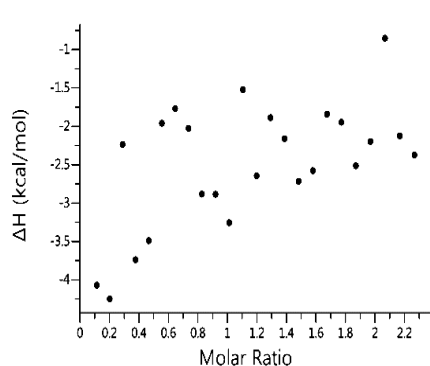

ii. p12 L104A, Y105A and PCNA

Figure 7

A.

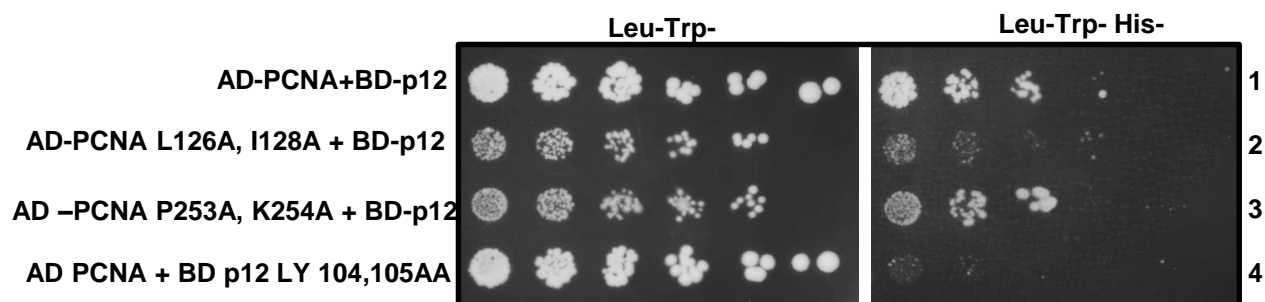

B.

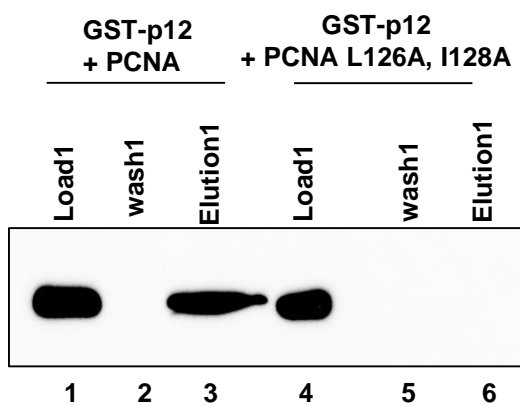

Figure 8

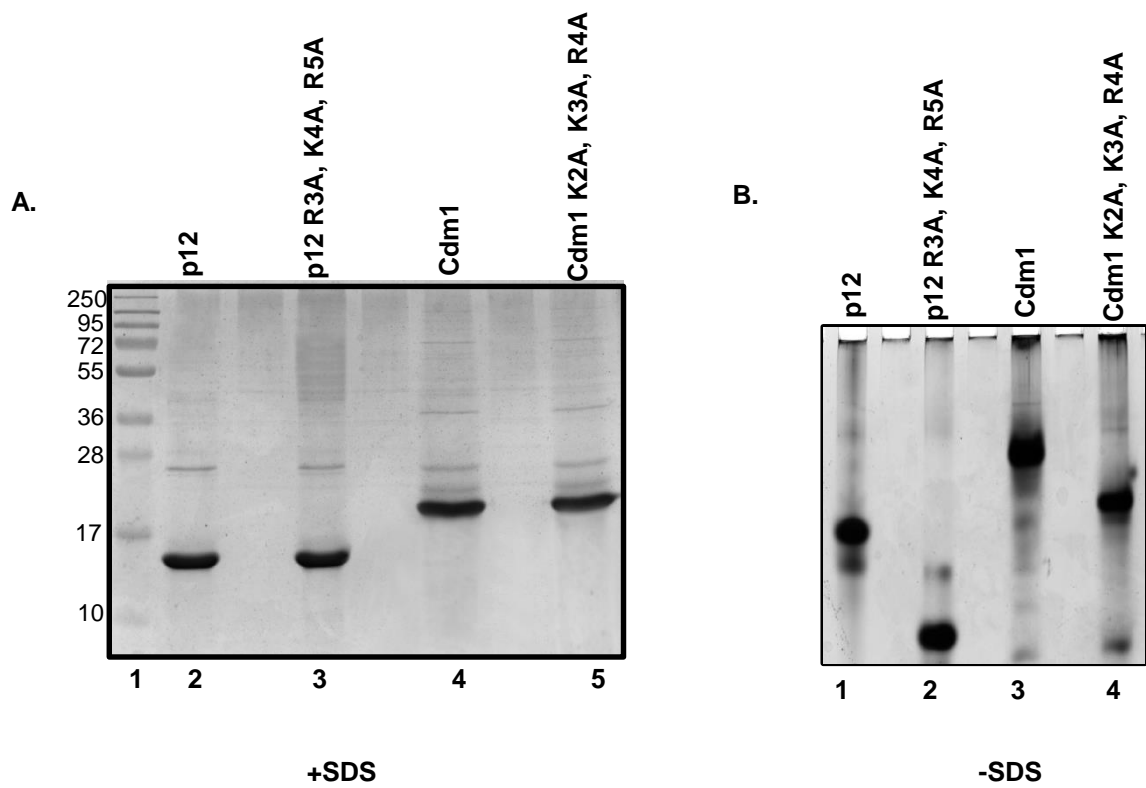

**Figure 9**

A.

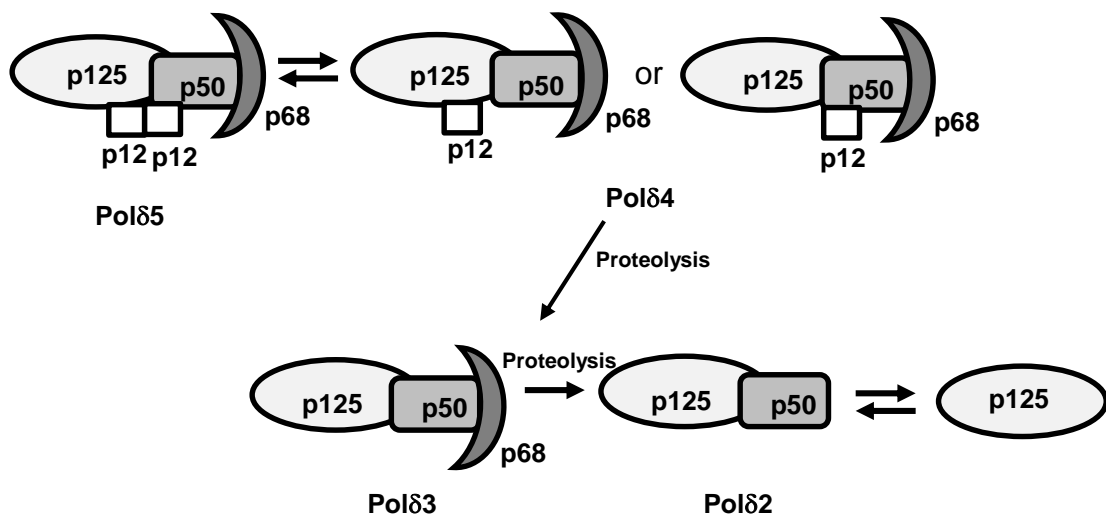

B.

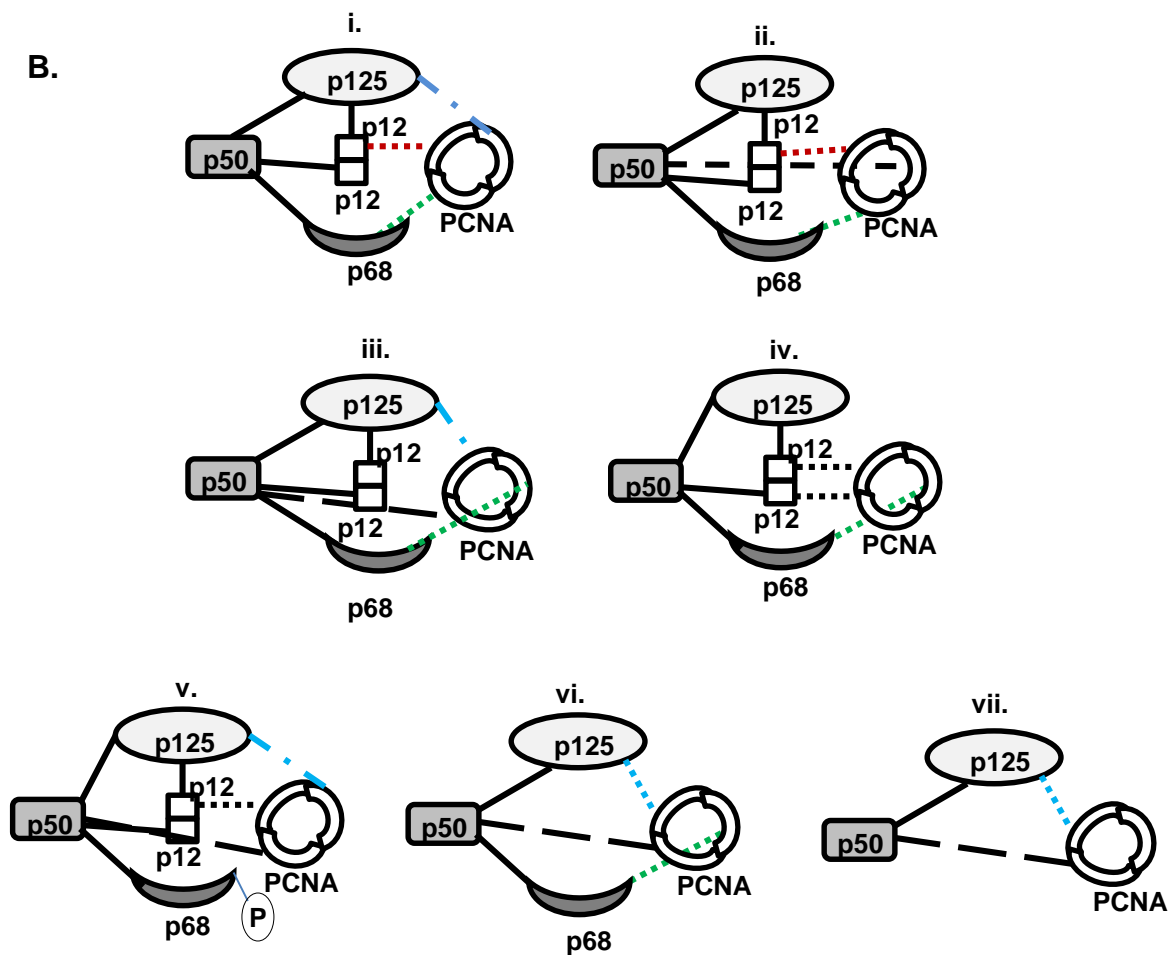

Figure 10
