# Supplementary material for: Human DNA polymerase delta is a pentameric holoenzyme with dimeric p12 subunit: Implications in enzyme architecture and PCNA interaction
Source: bioRxiv or medRxiv preprint supplement (doi:10.1101/525485), 2019-02-13
Supplement: Supplementary file [file media-1.pdf]

**Dimerization of p12, the fourth subunit of human DNA polymerase  $\delta$ , is a pre-requisite for its interaction with PCNA**

**Prashant Khandagale, Doureradjou Peroumal, Kodavati Manohar, and Narottam Acharya\***

Laboratory of Genomic Instability and Diseases, Department of Infectious Disease Biology, Institute of Life Sciences, Bhubaneswar-751023, India.

\*Correspondence to:

Narottam Acharya, Phone: 91-674-230 3540, Fax: 91-674-230 0728,

E-mail: narottam\_acharya@ils.res.in; narottam74@gmail.com

Running title: p12 the smallest subunit of hPol $\delta$

Key words: Processivity, formaldehyde cross linking, size exclusion chromatography, Cdm1, Replication foci, DNA replication

**Supplementary Fig. 1:** GST-affinity purification of hPol $\delta$  holoenzyme was carried out by using bacterial expression constructs harboring GST-p125 and a triple expressing plasmid containing p12, p50 and p68. Both p125 and p12 possess protease site. Cleaved p12 retains FLAG-tag and thus it migrates ~22Kda position. \* Bacterial chaperon and other non-specific proteins. Stoichiometry of FLAG-p12 is higher than any other subunit. Indicated bands were also authenticated by western blot analysis.

**Supplementary Fig. 2:** p12 RKR (1-MGRKRLITDSYPVK-14) and PIP (92-GDPRFQCSLWHL YPL-106) motif harboring domains were used for peptide structure prediction by using PEP-FOLD3 server (<http://bioserv.rpbs.univ-paris-diderot.fr/services/PEP-FOLD3/>). The models were validated by SAVES and Ramachandran plot. RKR-motif forms a stable  $\alpha$ -helix, whereas PIP motif forms a  $3_{10}$  helix.

**Supplementary Fig. 3:** p12 proteins were purified to near homogeneity from bacterial cells by using GST-affinity column chromatography, GST-tag was cleaved off by PreScission protease, and analyzed by SDS containing polyacrylamide gel electrophoresis (PAGE). Lane 1, MW; Lane 2, CA; Lane 3 wild type; Lane 4 R3A, K4A, R5A and Lane 5 L104A, Y105A p12 proteins.

**Supplementary table- 1:** List of primers used for various orfs amplification with underlined restriction enzymes.

| Primer  | Primer sequence (5'----3')                            | Name of the ORF |
|---------|-------------------------------------------------------|-----------------|
| NAP 239 | ccggg <u>gatcc</u> acatatgttcgaggcgcgcc               | hPCNA           |
| NAP 240 | ccggg <u>gatcc</u> ctaagatccttcttcac                  | hPCNA           |
| NAP 251 | ccggg <u>gatcc</u> gtatgttcgaggcgcgcc                 | hPCNA           |
| NAP 300 | ctacacagctgactcctgttctggagctccagcttgtcaacac           | hPCNA           |
| NAP 304 | gatgttgaacaagctggagctccagaacaggagtacagctgtgtag        | hPCNA           |
| NAP 305 | ggccggatccctaagatccttctcatcctcgagggcagccaag           | hPCNA           |
| NAP 254 | ggcc <u>gatcctc</u> agggccagccccagg                   | p50             |
| NAP 255 | ggc <u>gaattc</u> atgtttctgagcaggctgc                 | p50             |
| NAP 257 | ggcc <u>gatcctt</u> atttctctctggaagaagcc              | p68             |
| NAP 258 | ggc <u>gaattc</u> atggcggaccagctttatctgg              | p68             |
| NAP 260 | ccggg <u>gatcc</u> acatatgggccggaagcggctc             | p12             |
| NAP 261 | ggcc <u>gatcctc</u> ataggggatagagatgcc                | p12             |
| NAP 262 | ggc <u>gaattc</u> atgggccggaagcggctc                  | p12             |
| NAP 265 | ggcc <u>gatcctc</u> ataggggagcggcatgccagagactg        | p12             |
| NAP 362 | ccggg <u>gatcc</u> gtatgggcgccgctgcactcatcactgattcc   | p12             |
| NAP 373 | ggcc <u>gatcc</u> acatatgggcgccgctgcactcatcactg       | p12             |
| NAP 252 | ggc <u>gaattc</u> atggatggcaagcggcgg                  | p125            |
| NAP 248 | ggcc <u>gatcctc</u> caccaggcctcaggccaggggtcc          | p125            |
| NAP 361 | ggcc <u>gatcc</u> ctagcctggaatggtttgaag               | Cdm1            |
| NAP 451 | ccggg <u>gatcc</u> acatatgaagaagcgcac                 | Cdm1            |
| NAP 452 | ggcc <u>gatcc</u> acatatgactactcaagcgaaaaatcaggg      | Cdm1            |
| NAP 448 | cggc <u>gaattc</u> tatgggccggaagcgg                   | p12             |
| NAP 450 | ccggg <u>gatcc</u> gtaggggatagagatg                   | p12             |
| NAP 444 | ccgg <u>gaattc</u> tatgctagaaaacaatgc                 | Polθ            |
| NAP 151 | ccgggtcgac <u>ggatcctt</u> acacatcaaagtccttagctctcccc | Polθ            |

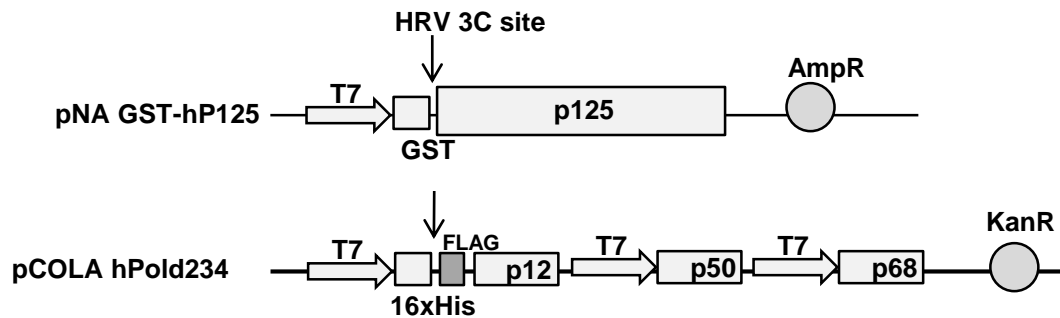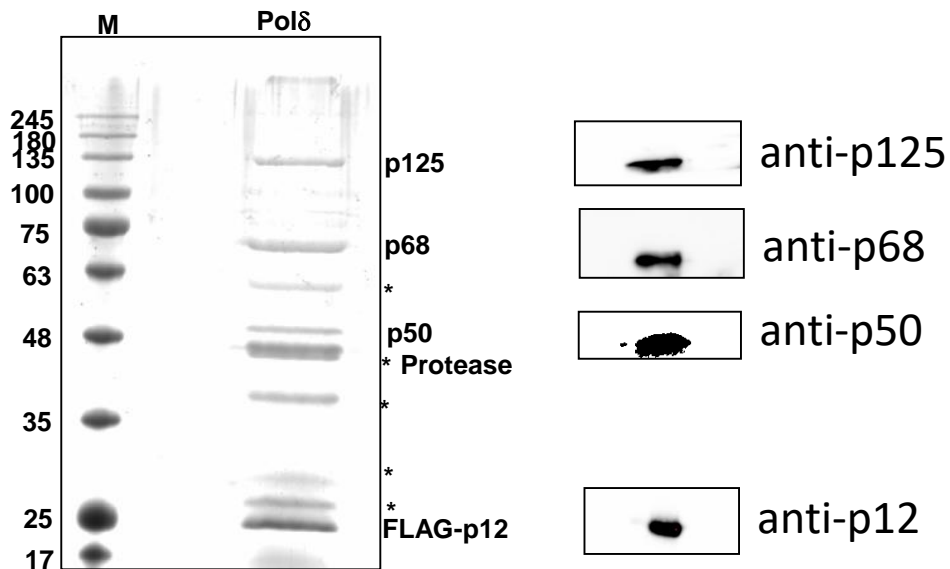

Supp. Figure. 1

A.

1-MGRKRLITDSYPVVKRREG-19

89-KTHPGDPRFQCSLWHL YPL-107

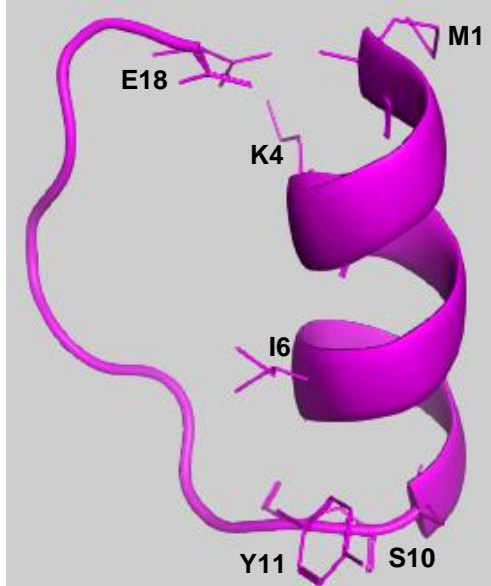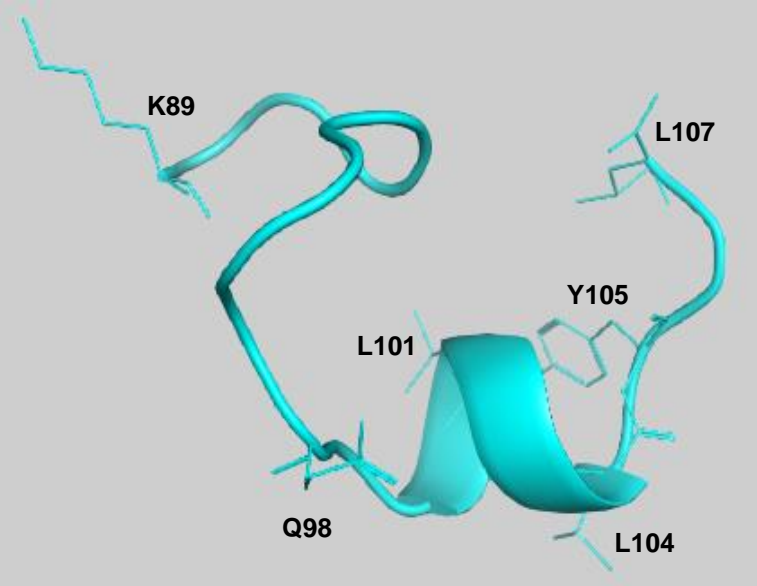

B.

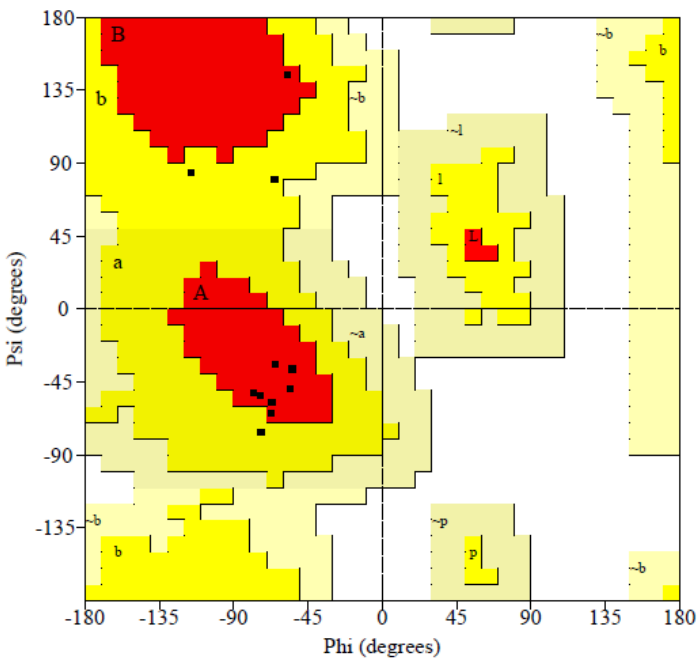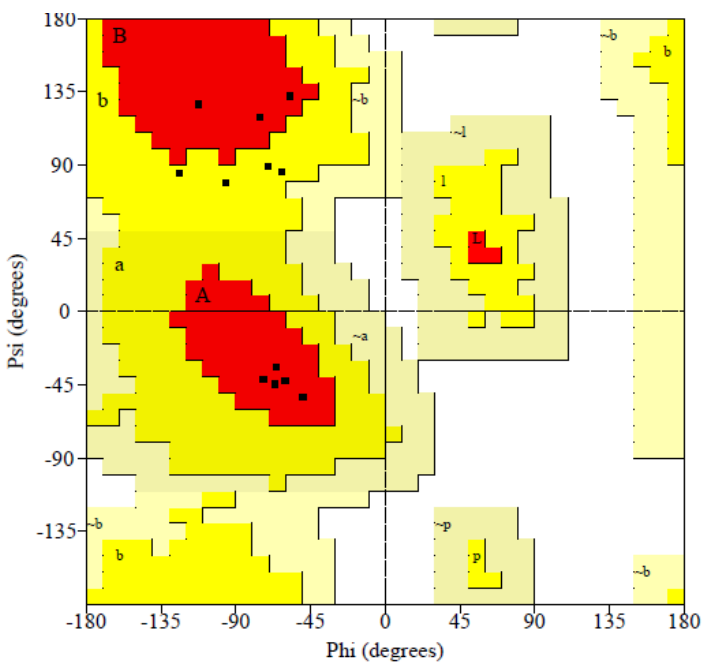

Supp. Figure. 2

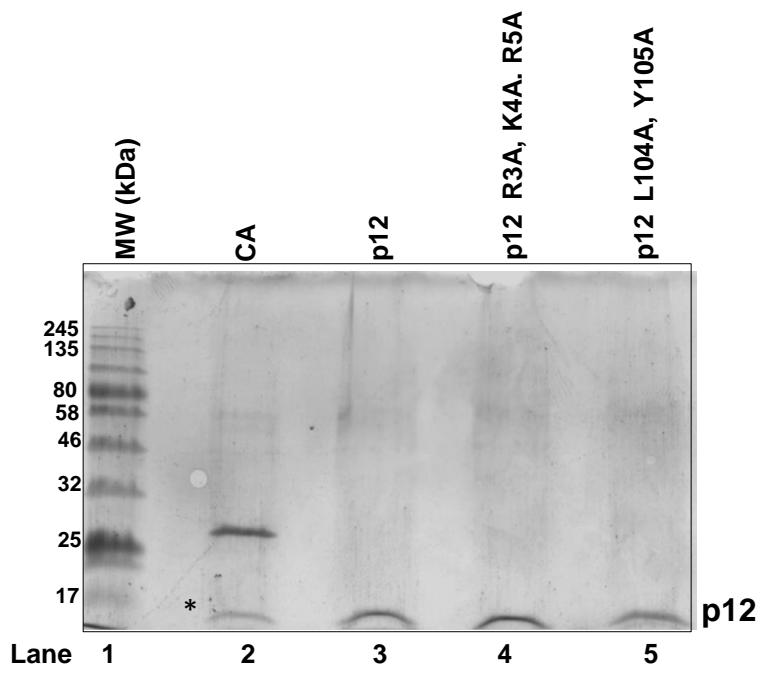

Supp. Figure. 3
