# Supplementary material for: Human DNA polymerase delta is a pentameric holoenzyme with dimeric p12 subunit: Implications in enzyme architecture and PCNA interaction
Source: bioRxiv or medRxiv preprint supplement (doi:10.1101/525485), 2019-02-13
Supplement: Supplementary file [file media-2.pdf]

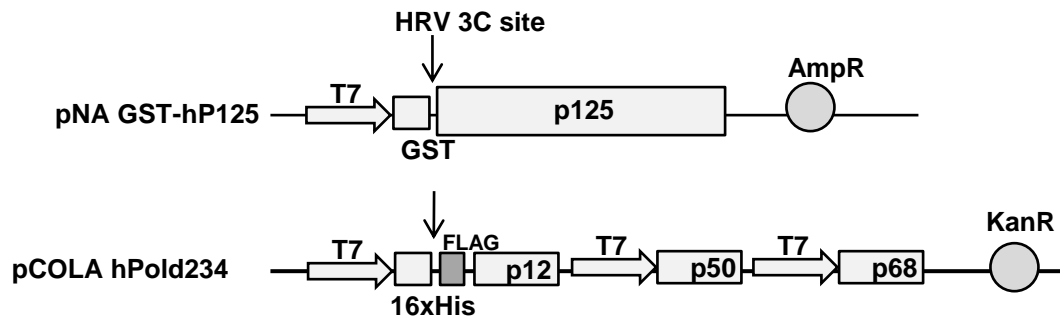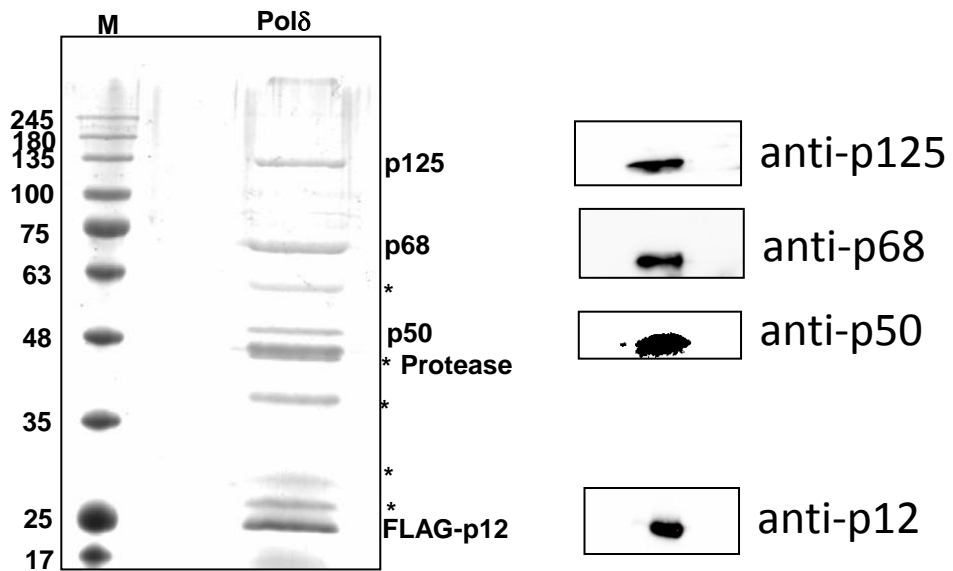

Supp. Figure. 1

A.

1-MGRKRLITDSYPVVKRREG-19

89-KTHPGDPRFQCSLWHL YPL-107

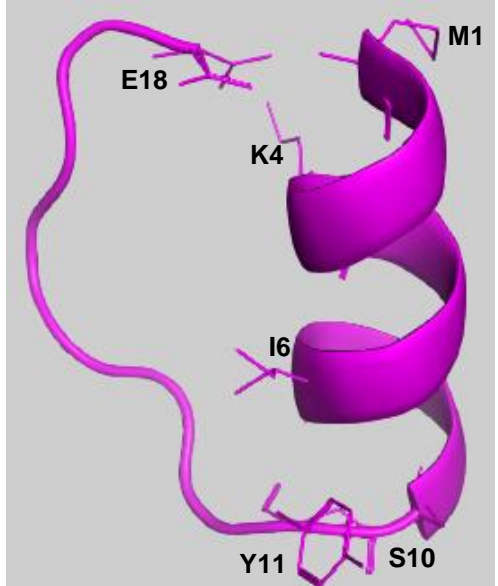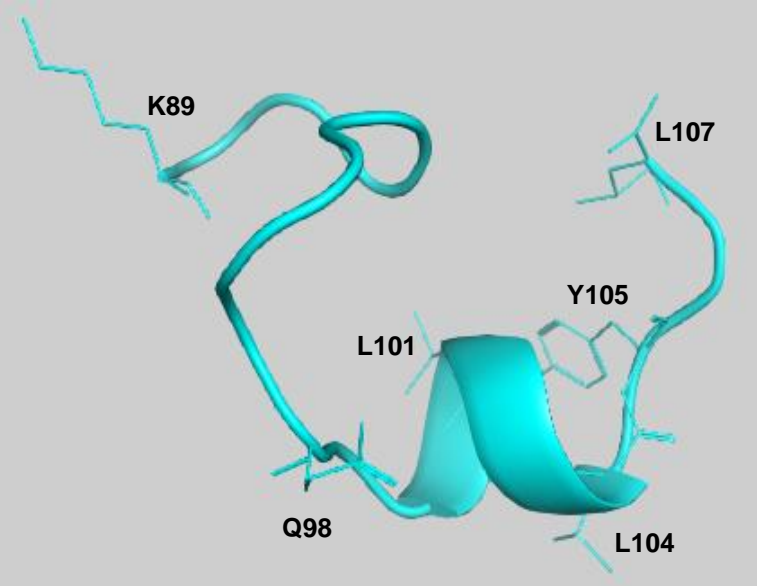

B.

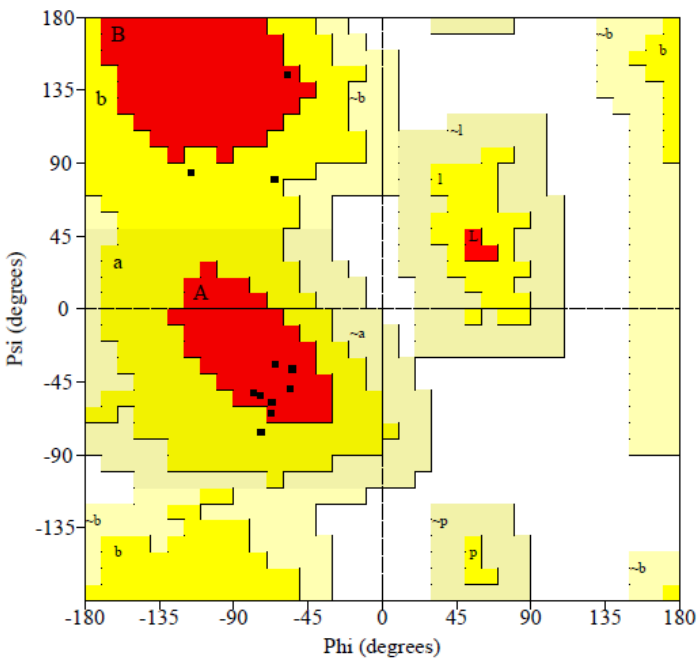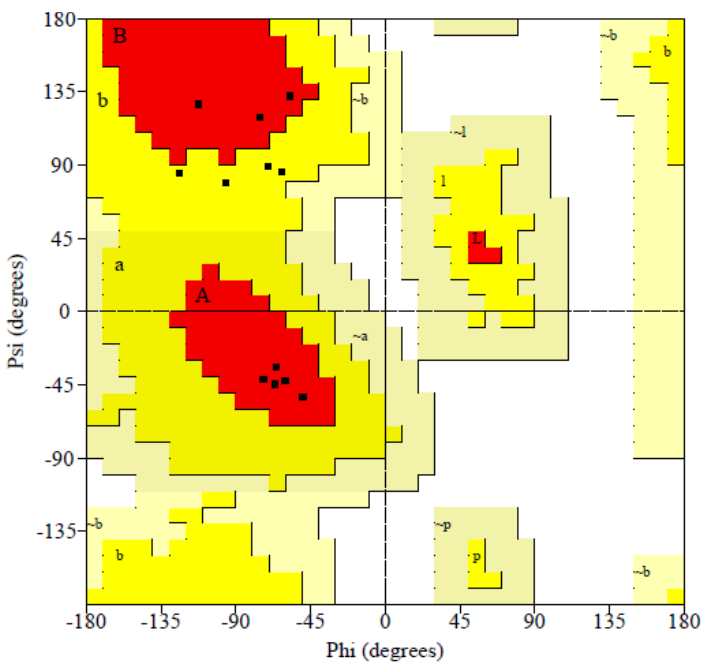

Supp. Figure. 2

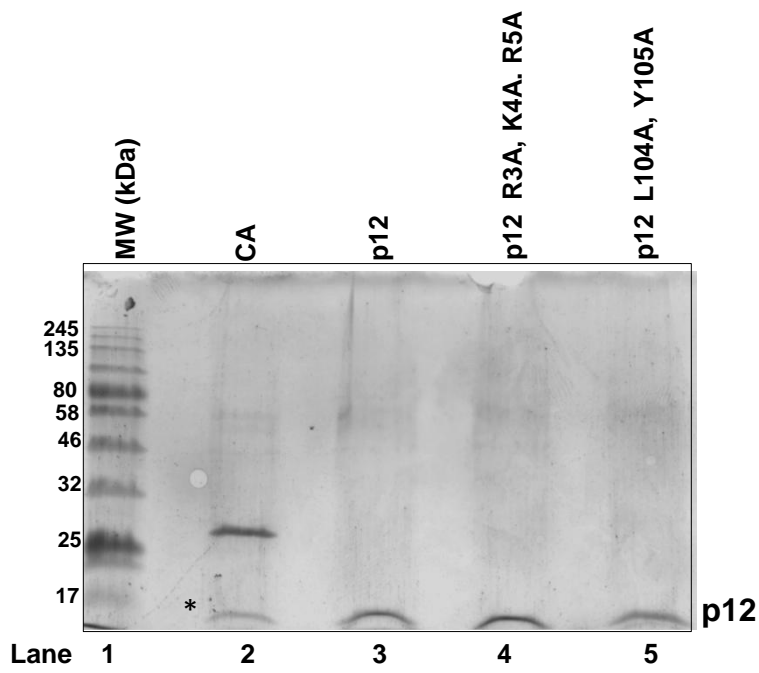

Supp. Figure. 3
